# Supplementary material for: Activated regulatory T-cells promote duodenal bacterial translocation into necrotic areas in severe acute pancreatitis
Source: HighWire-hosted journal article supplement (doi:10.1136/gutjnl-2022-327448), 2023-01-11
Supplement: gutjnl-2022-327448supp001_data_supplement.pdf [file gutjnl-2022-327448supp001_data_supplement.pdf]

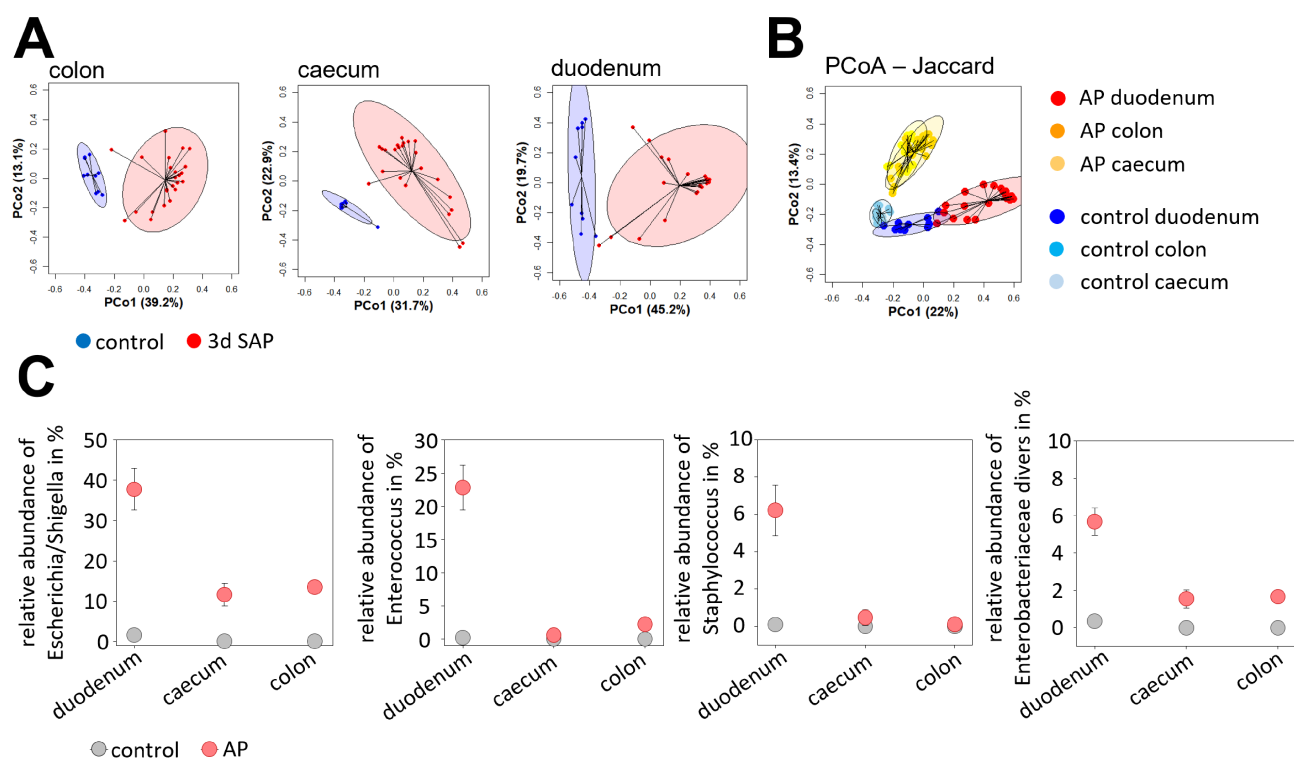

**Figure S1:** Analysis of the murine intestinal microbiome during AP. (A) 16S rRNA gene sequencing was performed using faecal samples of colon, caecum and duodenum of C57Bl/6 mice (control n=10 vs. AP n=24). Principal coordinate analysis showed AP-associated changes of the microbiome pattern (AP in red, controls in blue) in all three parts of the gut. Permutational multivariate analysis of variance confirmed significant differences (colon:  $p < 0.001$ ,  $R^2 = 32.7\%$ , caecum:  $p < 0.001$ ,  $R^2 = 26.0\%$  and duodenum:  $p < 0.001$ ,  $R^2 = 35.3\%$ ) (B) Jaccard coefficient index suggested high similarity between colon and caecum samples, but differences for duodenum samples. (C) The abundance and specific localization of the facultative pathogenic bacteria *Escherichia/Shigella*, *Enterococcus*, *Staphylococcus*, and *Enterobacteriaceae* divers within the gut is shown.
