# Supplementary material for: Activated regulatory T-cells promote duodenal bacterial translocation into necrotic areas in severe acute pancreatitis
Source: PubMed Central journal article supplement — Gut. 2023 Jan 11;72(7):1355–69. doi: 10.1136/gutjnl-2022-327448 (PMC10314084; doi:10.1136/gutjnl-2022-327448), 2023-01-11
Supplement: gutjnl-2022-327448supp003.pdf [file gutjnl-2022-327448supp003.pdf]

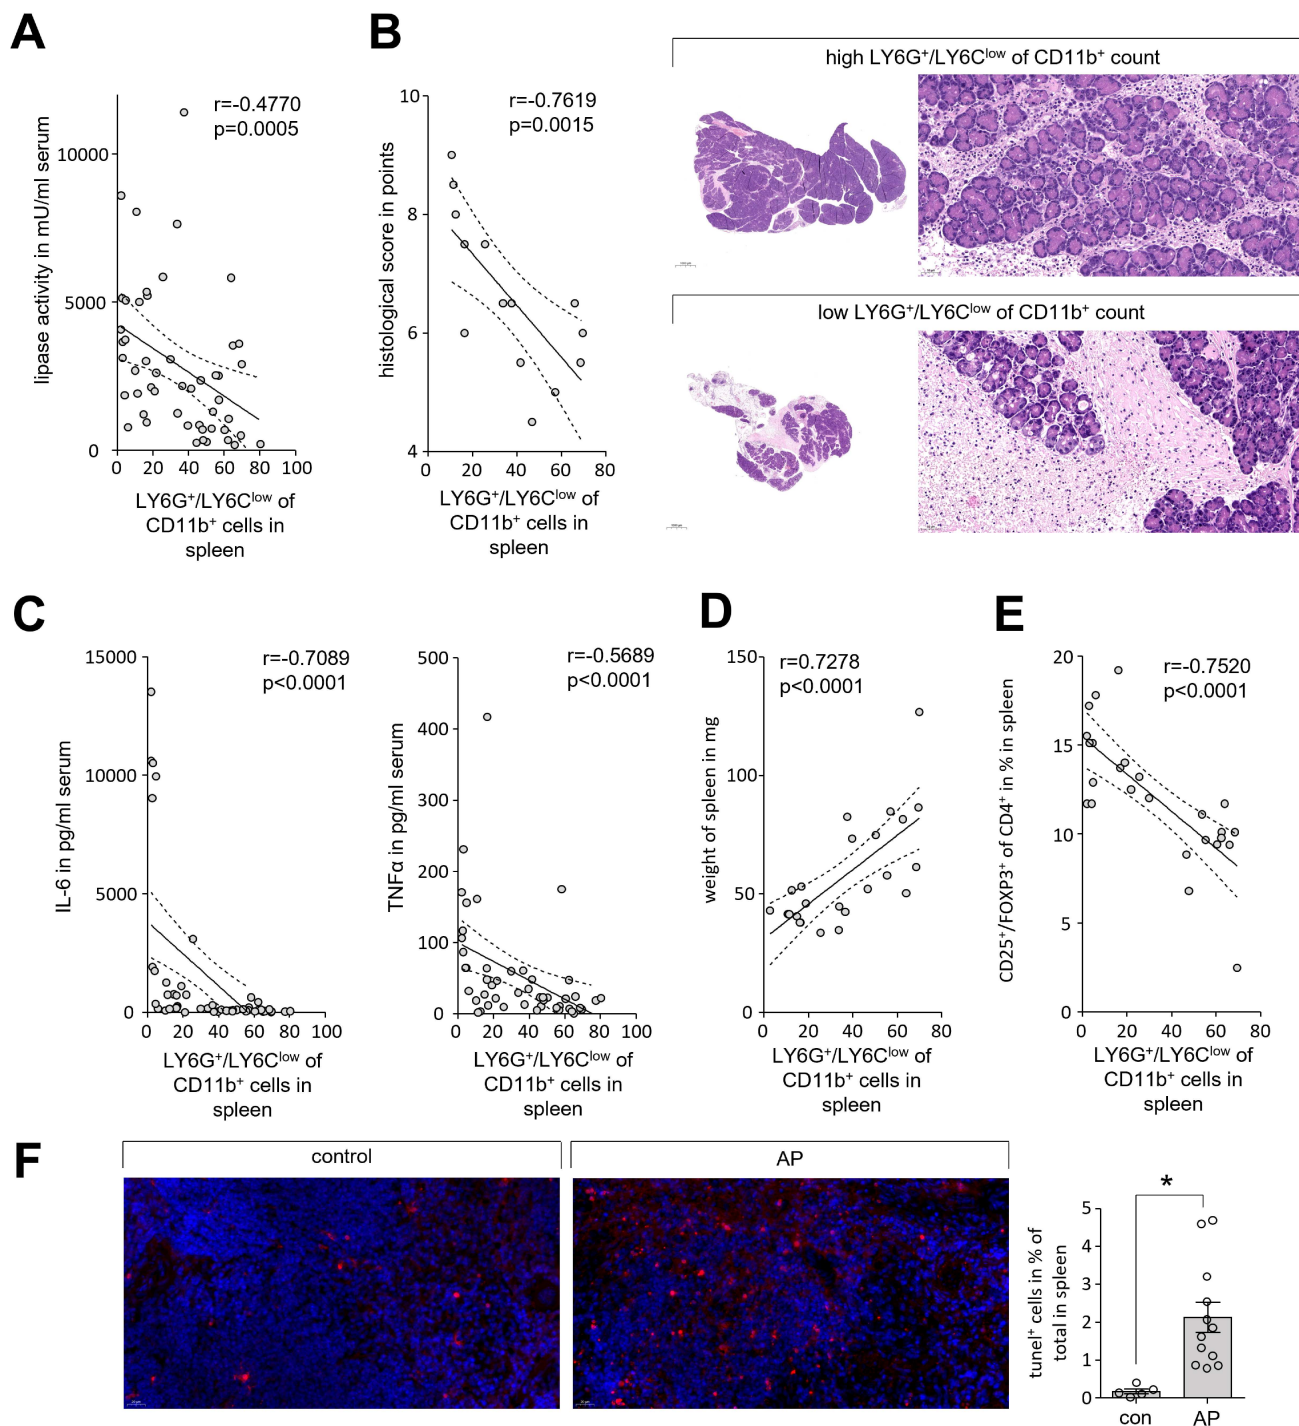

**Figure S3:** The LY6G<sup>+</sup>/LY6C<sup>low</sup> of CD11b<sup>+</sup> cell ratio in spleen showed an inverse correlation with disease severity. Acute pancreatitis was induced by partial duct ligation. (A, B) Correlation analysis of splenic LY6G<sup>+</sup>/LY6C<sup>low</sup>/CD11b<sup>+</sup> cells with serum lipase and histological scoring showed a significant negative correlation of the number of LY6G<sup>+</sup>/LY6C<sup>low</sup>/CD11b<sup>+</sup> cells with the disease severity of acute pancreatitis. (C) The same correlation could be shown for the concentration of pro-inflammatory serum cytokines IL-6 and TNFα. (D) Furthermore, we observed a positive correlation of splenic LY6G<sup>+</sup>/LY6C<sup>low</sup>/CD11b<sup>+</sup> cells with the spleen weight and (E) a negative correlation with the number of splenic FOXP3<sup>+</sup>/CD25<sup>+</sup> T<sub>regs</sub>. (F) Acute pancreatitis induced significant immune cell apoptosis in spleen shown by TUNEL positive cells, significance was tested by using student t-test for independent samples,  $p<0.05$  are marked by an asterisk. Significance of correlation was tested by Spearman's rank correlation-coefficient, p value and Spearman's r is shown in all graphs.
