# Supplementary material for: Activated regulatory T-cells promote duodenal bacterial translocation into necrotic areas in severe acute pancreatitis
Source: HighWire-hosted journal article supplement (doi:10.1136/gutjnl-2022-327448), 2023-01-11
Supplement: gutjnl-2022-327448supp004_data_supplement.pdf [file gutjnl-2022-327448supp004_data_supplement.pdf]

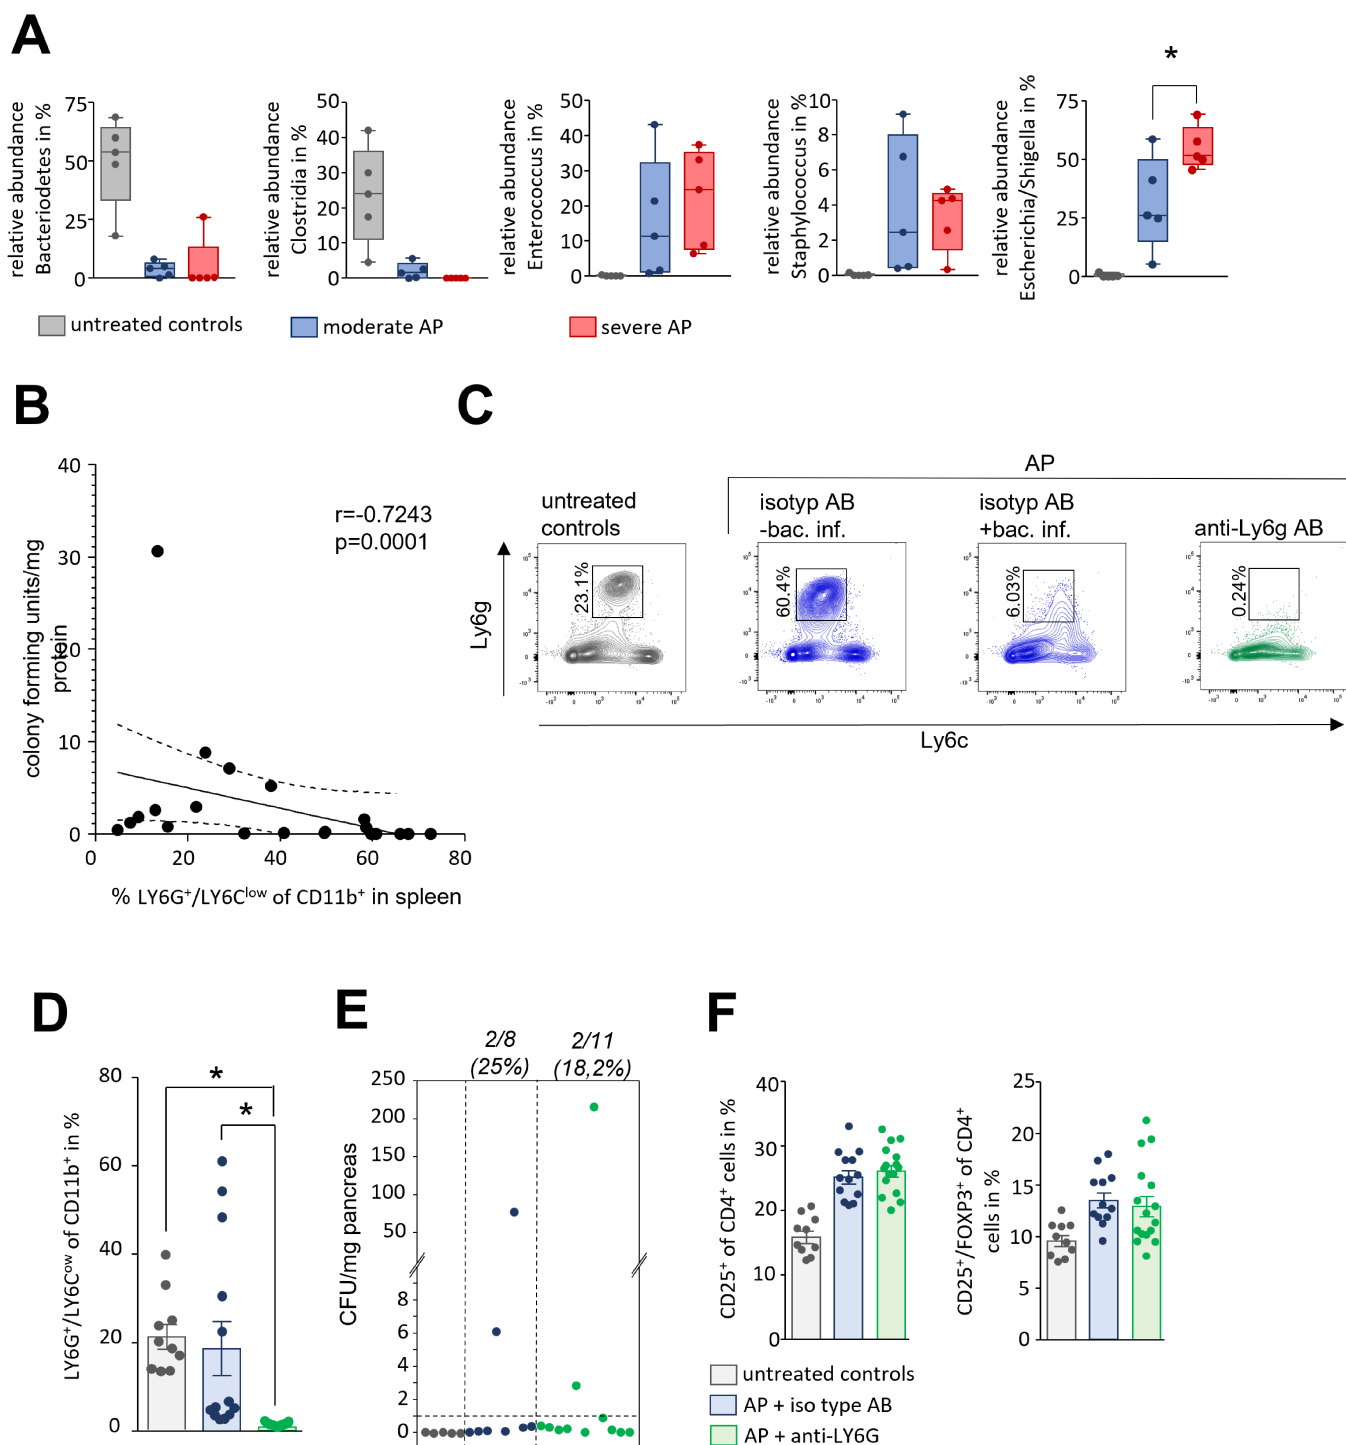

**Figure S4:** The LY6G<sup>+</sup>/LY6C<sup>low</sup> of CD11b<sup>+</sup> cell ratio in spleen represents a marker of bacterial infection. (A) Box plots illustrate that facultative pathogens were enriched, whereas commensal bacteria were reduced in duodenum in a severity dependent manner during AP. (B) The percentage of LY6G<sup>+</sup>/LY6C<sup>low</sup> of CD11b<sup>+</sup> cells in spleen showed a negative correlation with bacterial load in pancreas (CFU) (spearman correlation  $p=0.0001$ ). AP was induced by partial pancreatic duct ligation in C57Bl/6 mice and *in vivo* depletion of LY6G<sup>+</sup> cells was performed by anti-LY6G antibody ( $n=11$ ) while controls received isotype antibody in the same concentration ( $n>8$ ). (C-D) Effective depletion of LY6G<sup>+</sup> cells by a depleting antibody (anti-LY6G) was confirmed by flow cytometry of splenocytes. (E) The depletion of LY6G<sup>+</sup> cells did not influence the bacterial translocation into pancreatic tissue. (F) The pancreatitis-induced T-cell/T<sub>reg</sub> activation was also not affected by anti-LY6G treatment. Statistically significant differences were tested by unpaired student's t-test for independent samples and significance levels of  $p<0.05$  are marked by an asterisk.
