# Supplementary material for: Activated regulatory T-cells promote duodenal bacterial translocation into necrotic areas in severe acute pancreatitis
Source: HighWire-hosted journal article supplement (doi:10.1136/gutjnl-2022-327448), 2023-01-11
Supplement: gutjnl-2022-327448supp005_data_supplement.pdf [file gutjnl-2022-327448supp005_data_supplement.pdf]

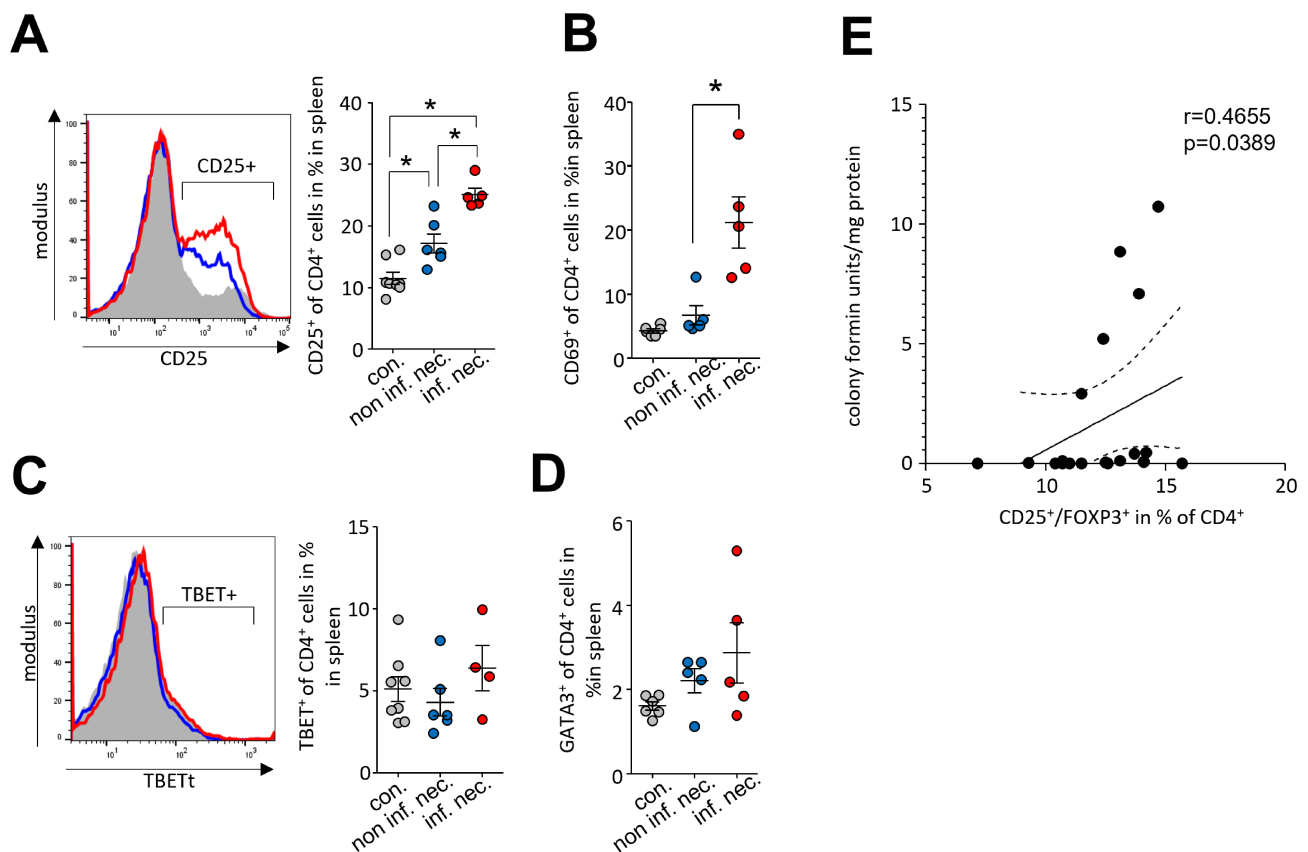

**Figure S5:** The Splenic T-cell response depends on the severity of AP. (A-D) Flow cytometry of splenic CD4<sup>+</sup> cells was performed in AP mice (n>5/group) that also were analysed for the development of infected necrosis. (A) Dot plots illustrate the increase of CD25<sup>+</sup> T-cells in spleen (B) and show increased ratios of CD69<sup>+</sup> T-cells in conditions of severe AP (C), whereas TBET<sup>+</sup> Th1-cells in spleen were not affected by AP or the infection of pancreatic necrosis (D) and GATA3<sup>+</sup> Th2-cell numbers were also not significantly increased. (E) CD25<sup>+</sup>/FOXP3<sup>+</sup> T<sub>reg</sub> showed a positive spearman correlation with infected necrosis measured by CFU in pancreatic tissue (p=0.0389). Statistically significant differences were tested by unpaired student's t-test for independent samples and significance levels of p<0.05 are marked by an asterisk.
