# Supplementary material for: Activated regulatory T-cells promote duodenal bacterial translocation into necrotic areas in severe acute pancreatitis
Source: PubMed Central journal article supplement — Gut. 2023 Jan 11;72(7):1355–69. doi: 10.1136/gutjnl-2022-327448 (PMC10314084; doi:10.1136/gutjnl-2022-327448), 2023-01-11
Supplement: gutjnl-2022-327448supp006.pdf [file gutjnl-2022-327448supp006.pdf]

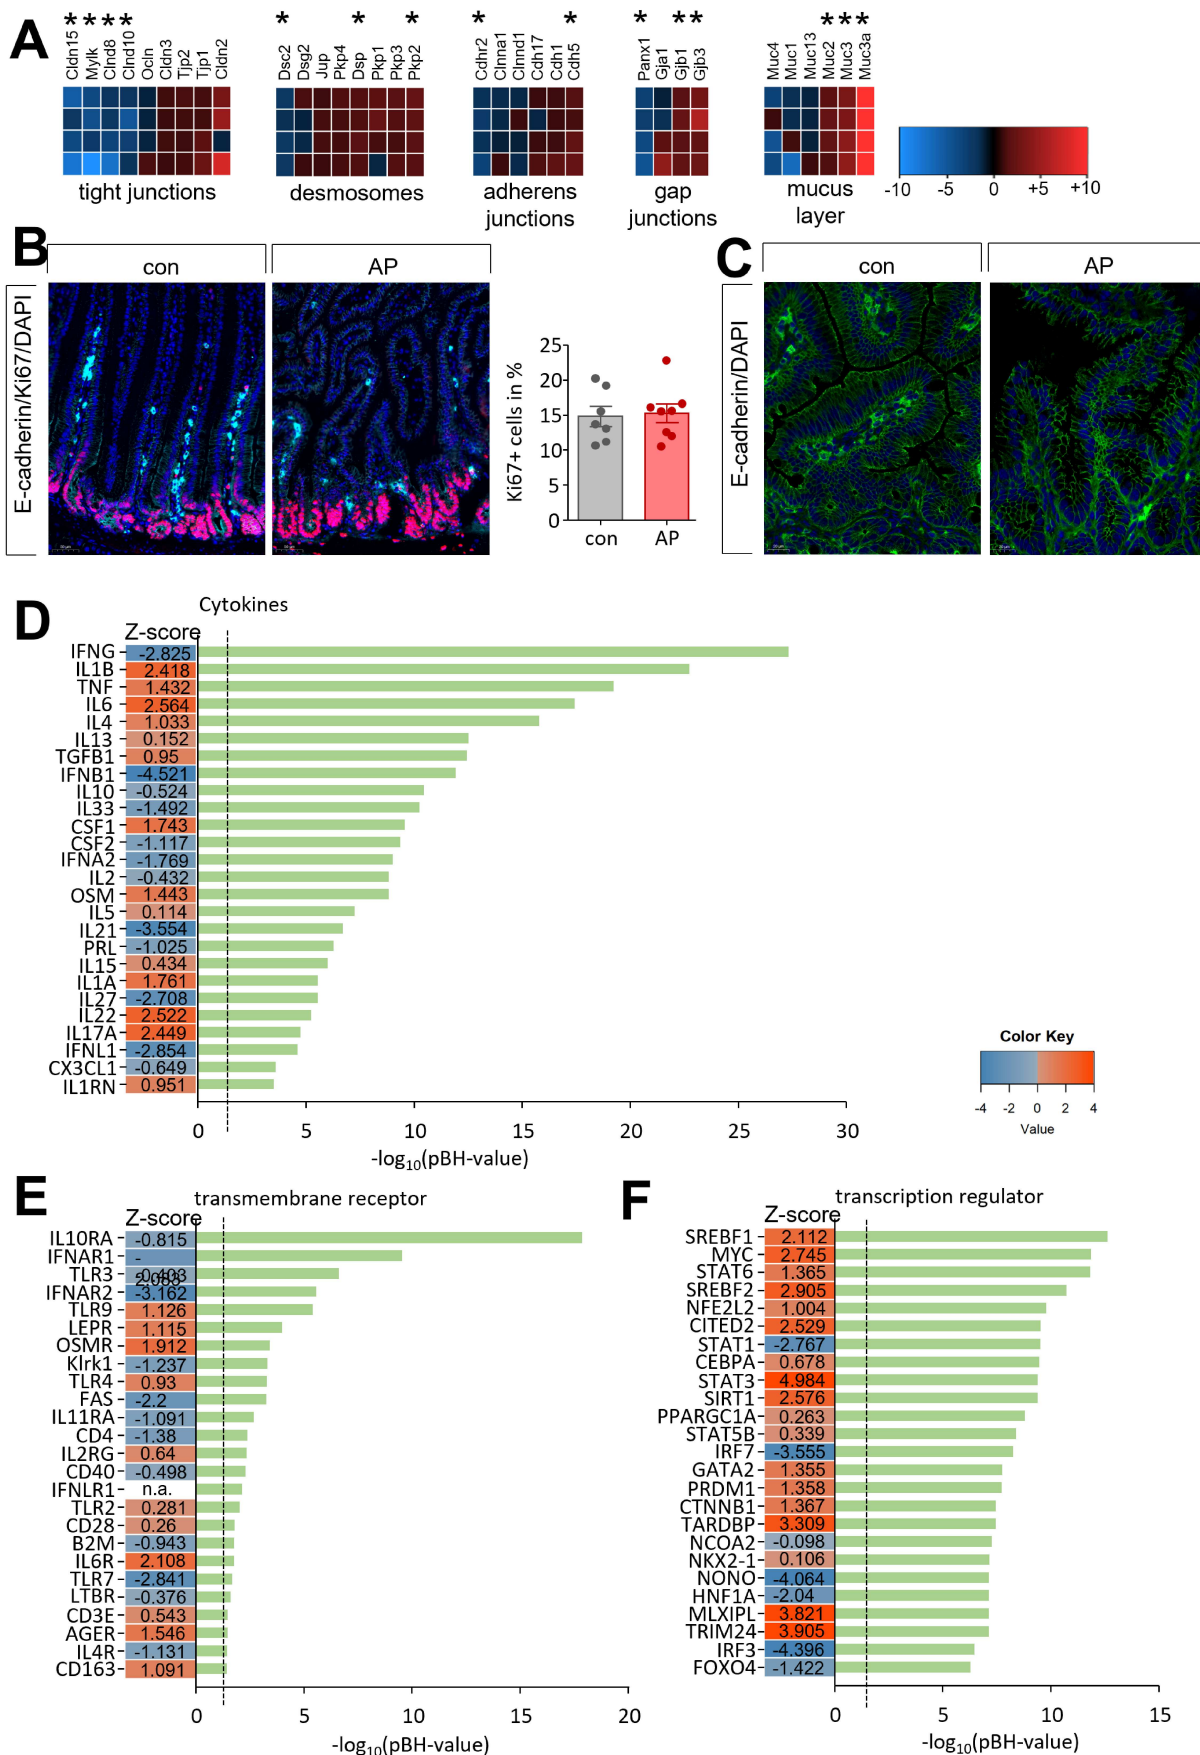

**Figure S6:** Pancreatitis-associated changes of the duodenal barrier function in C57Bl/6 mice. (A) RNA was prepared from duodenal tissue of AP and control C57Bl/6 mice (n=4 each) and microarray-based transcriptome analysis was performed. Heat maps illustrate AP-induced transcription changes of genes encoding cell-cell contact proteins. (B) Fluorescent Ki67 labeling of pancreatic sections (pink) showed no significant differences between AP and control animals. (C) E-cadherin (green) showed no AP-associated changes. (D-F). Bar graphs illustrate QIAGEN's Ingenuity Pathway Analysis (IPA) results ( $-\log_{10}(\text{pBH-value})$ ) for affected pathways of relevant genes in the group of cytokines (D), transmembrane receptors (E) and transcriptional regulators (F). Heatmap illustrates the z-score which indicates activation (positive z-score, red) or inhibition (negative z-score, blue) of the respective regulator.
