# Supplementary material for: Activated regulatory T-cells promote duodenal bacterial translocation into necrotic areas in severe acute pancreatitis
Source: PubMed Central journal article supplement — Gut. 2023 Jan 11;72(7):1355–69. doi: 10.1136/gutjnl-2022-327448 (PMC10314084; doi:10.1136/gutjnl-2022-327448), 2023-01-11
Supplement: gutjnl-2022-327448supp007.pdf [file gutjnl-2022-327448supp007.pdf]

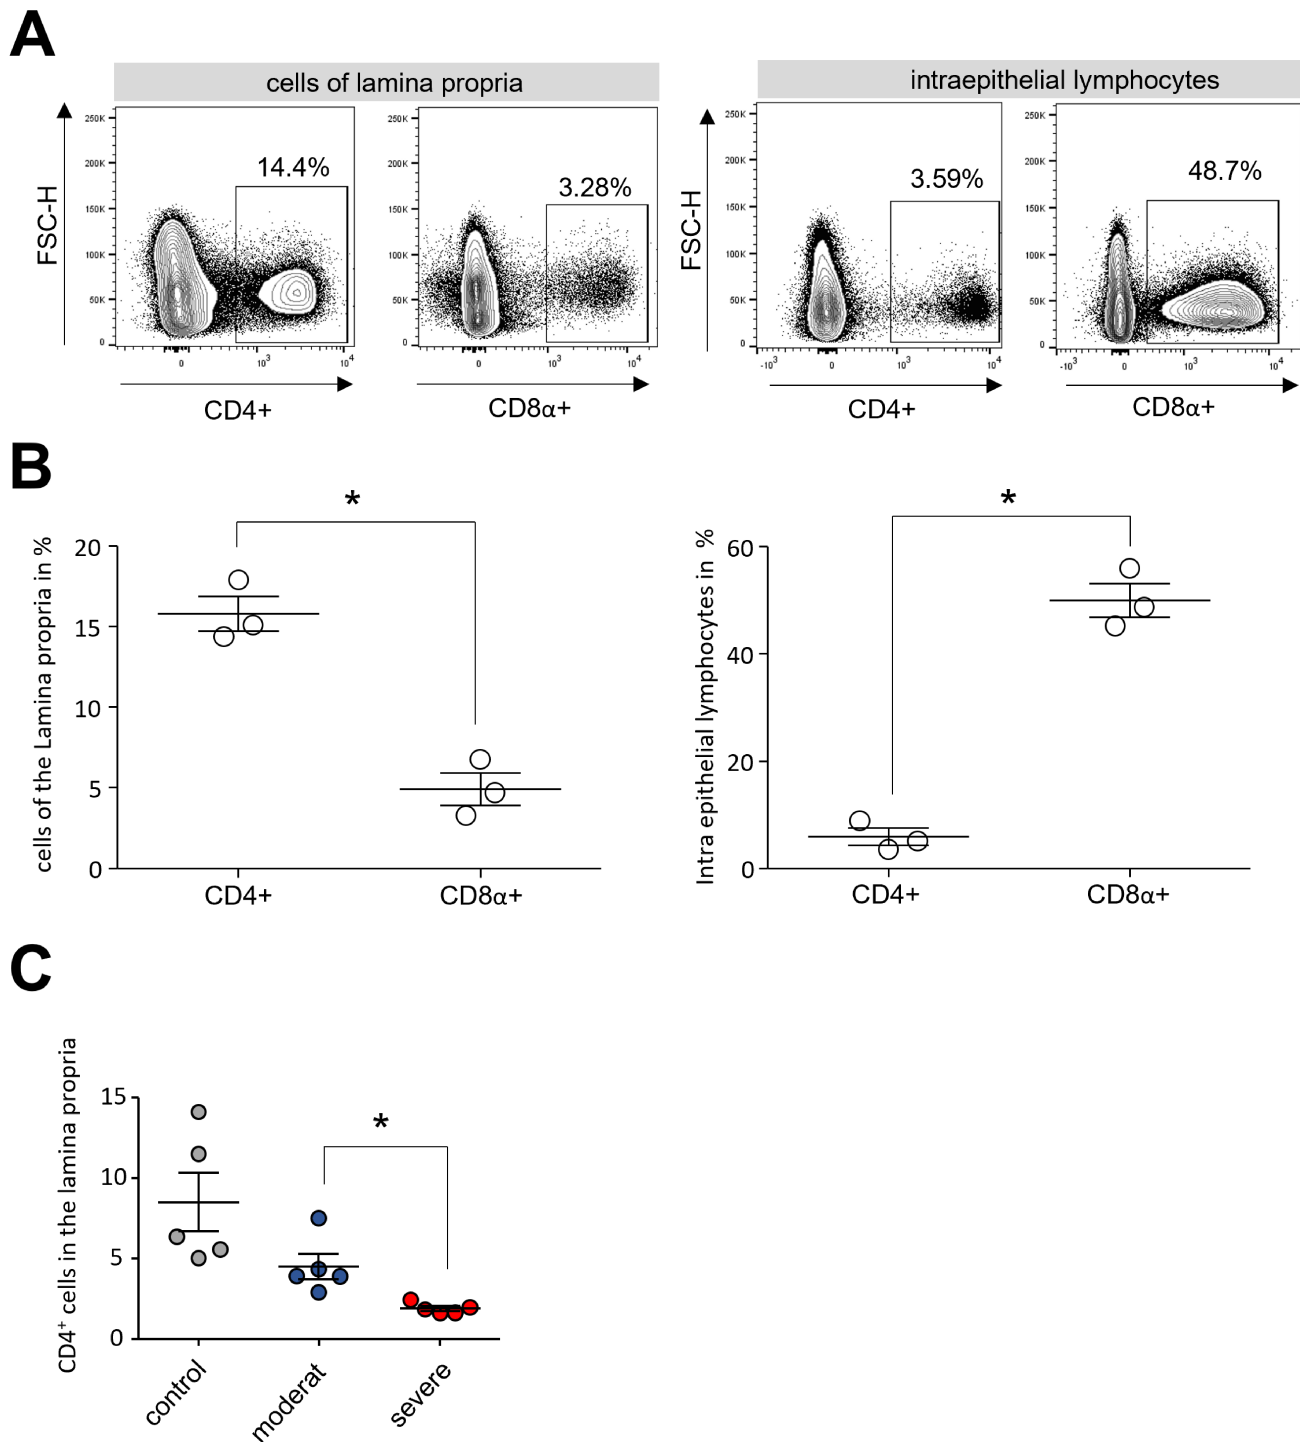

**Figure S7:** Test of purity of cell populations isolated from the duodenum. (A) Staining of CD4 and CD8 $\alpha$  illustrates the purity of cells from lamina propria and IELs after isolation from duodenum ( $n=3$ ). (B) Lymphocytes of the lamina propria showed expression of the T-cell surface marker CD4, whereas IELs strongly expressed CD8 $\alpha$ , but lack CD4. (C) Flow cytometry of CD4 $^+$  T-cells showed a severity dependent reduction of these cells in the lamina propria. Statistically significant differences were tested by unpaired student's t-test for independent samples and significance levels of  $p<0.05$  are marked by an asterisk.
