# Supplementary material for: Activated regulatory T-cells promote duodenal bacterial translocation into necrotic areas in severe acute pancreatitis
Source: HighWire-hosted journal article supplement (doi:10.1136/gutjnl-2022-327448), 2023-01-11

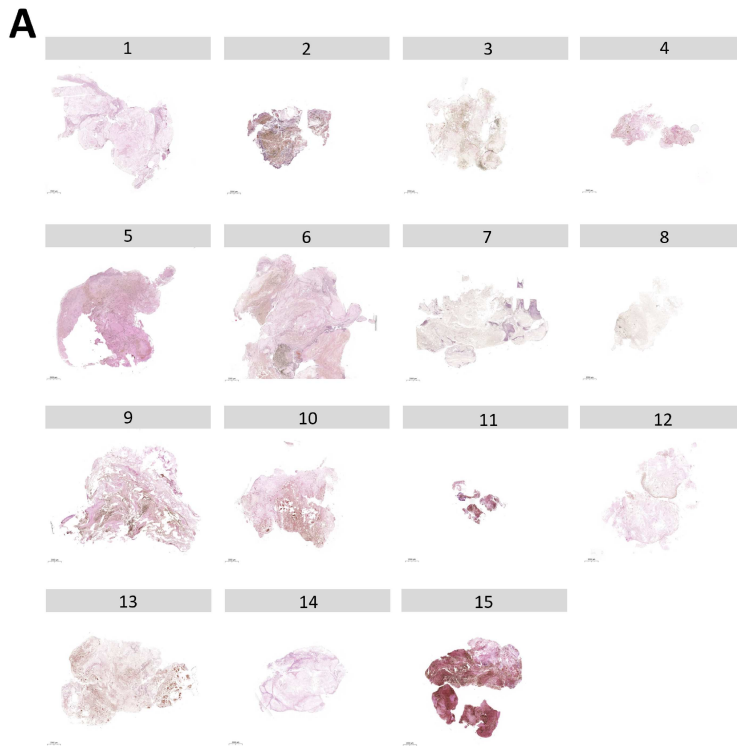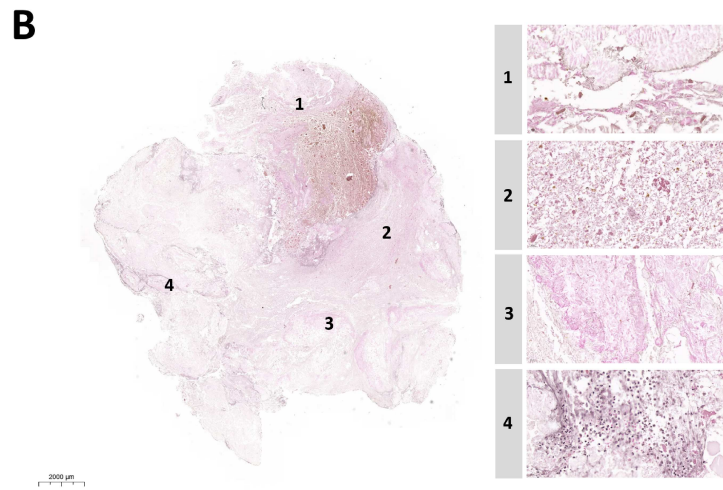

**C**

|                                       | patients         |
|---------------------------------------|------------------|
| Age (yr)                              | 61,7 (+/- 12.25) |
| Female                                | 15 (28.3%)       |
| ethiology                             |                  |
| biliary                               | 14 (26.4%)       |
| EtOH                                  | 14 (26.4%)       |
| ERCP                                  | 1 (1.89%)        |
| drug induced                          | 2 (3.77%)        |
| acute episode of chronic pancreatitis | 17 (32.1%)       |
| idiopathic                            | 9 (16.89%)       |
| clinical course                       |                  |
| Hospital stay (d)                     | 36.1 (+/- 30)    |
| Organ complications                   | 20 (37.74%)      |
| mortality                             | 3 (5.66%)        |

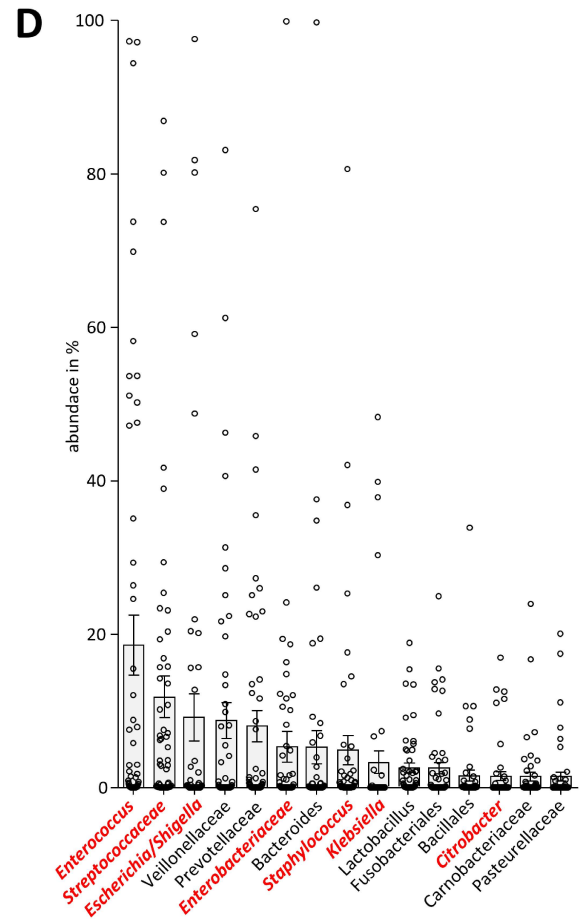

Supplement: gutjnl-2022-327448supp013_data_supplement.pdf [file gutjnl-2022-327448supp013_data_supplement.pdf]
