# Supplementary material for: Activated regulatory T-cells promote duodenal bacterial translocation into necrotic areas in severe acute pancreatitis
Source: HighWire-hosted journal article supplement (doi:10.1136/gutjnl-2022-327448), 2023-01-11
Supplement: gutjnl-2022-327448supp014_data_supplement.pdf [file gutjnl-2022-327448supp014_data_supplement.pdf]

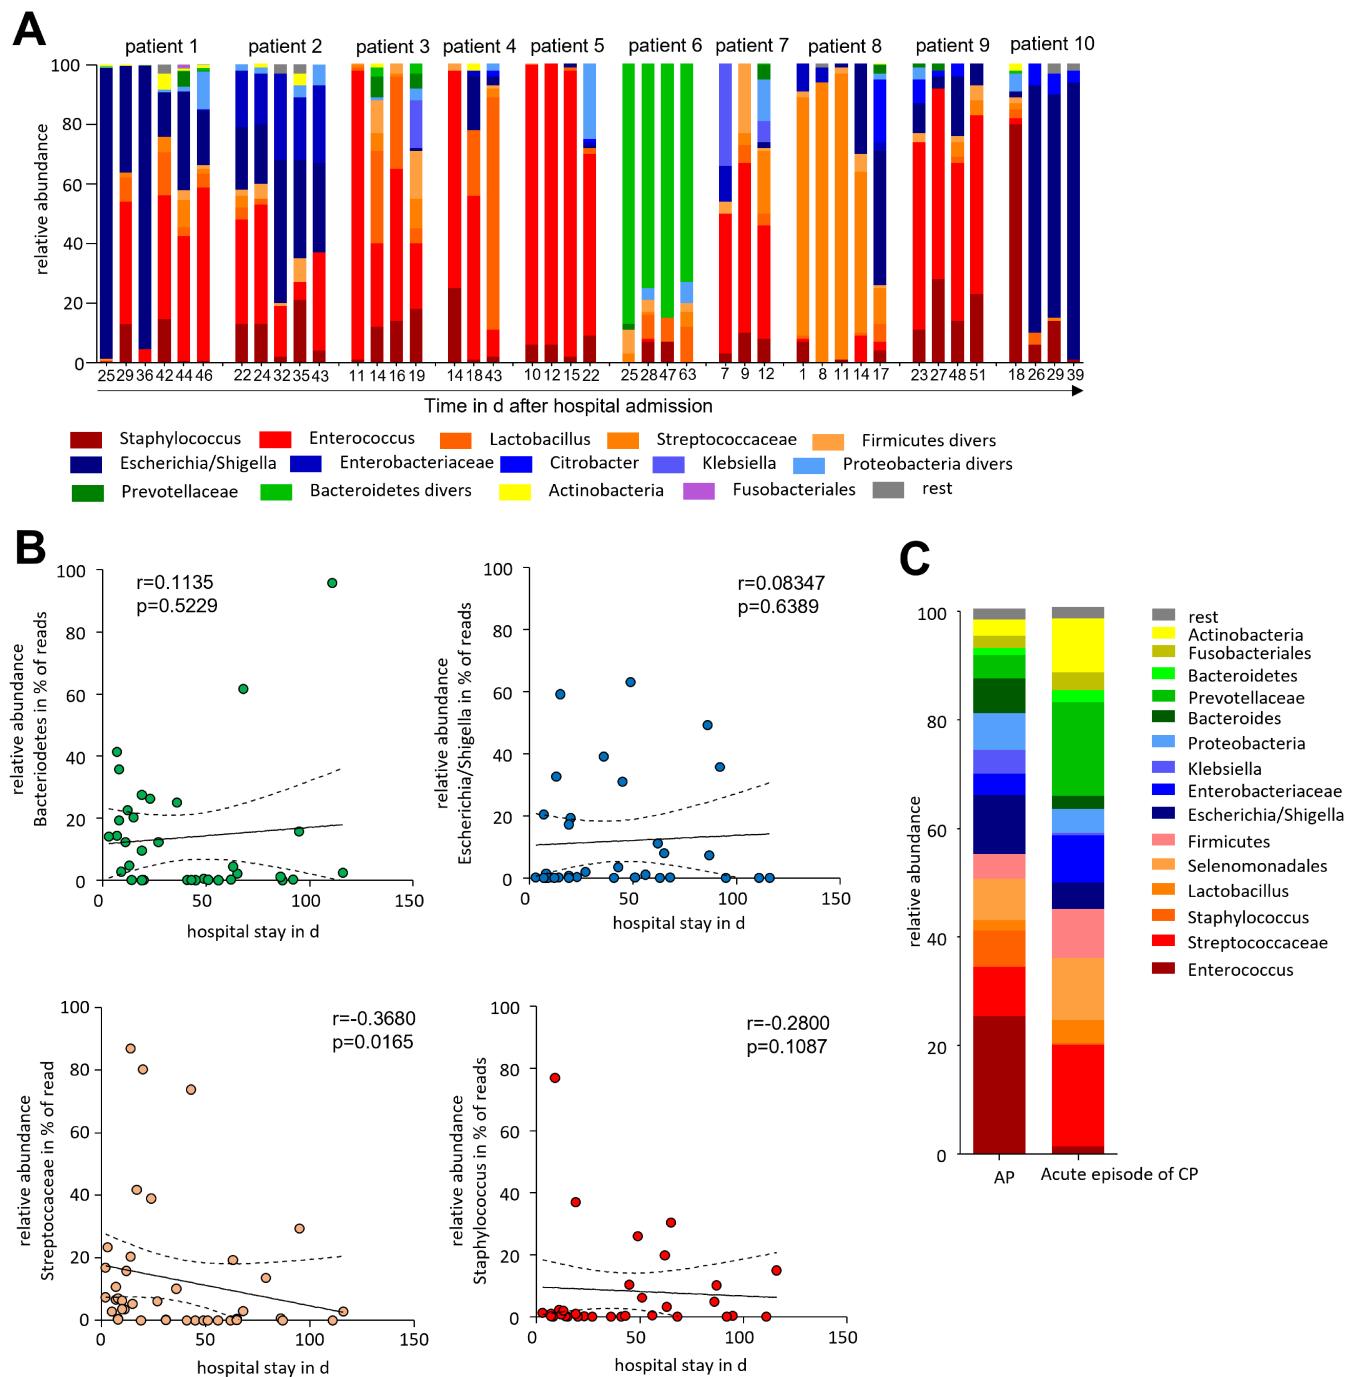

**Figure S14: Microbiome of human pancreatic necrosis samples.** (A) 16S rRNA gene sequencing analysis of follow-up necrosis samples of 10 patients illustrates a stable microbial colonization of pancreatic necrosis in the majority of patients over several weeks. (B) For 33 patients, Spearman's test for positive correlation of abundance and hospitalisation time demonstrated no positive correlation for the taxa *Bacteroidetes*, *Escherichia/Shigella* or *Staphylococcus* and *Streptococcaceae*. (C) Stacked bar graph illustrating microbiota composition of pancreatic necrosis in a subgroup analysis of patients with AP and patients with an acute episode of chronic pancreatitis.
