# Supplementary material for: Activated regulatory T-cells promote duodenal bacterial translocation into necrotic areas in severe acute pancreatitis
Source: PubMed Central journal article supplement — Gut. 2023 Jan 11;72(7):1355–69. doi: 10.1136/gutjnl-2022-327448 (PMC10314084; doi:10.1136/gutjnl-2022-327448), 2023-01-11
Supplement: gutjnl-2022-327448supp015.pdf [file gutjnl-2022-327448supp015.pdf]

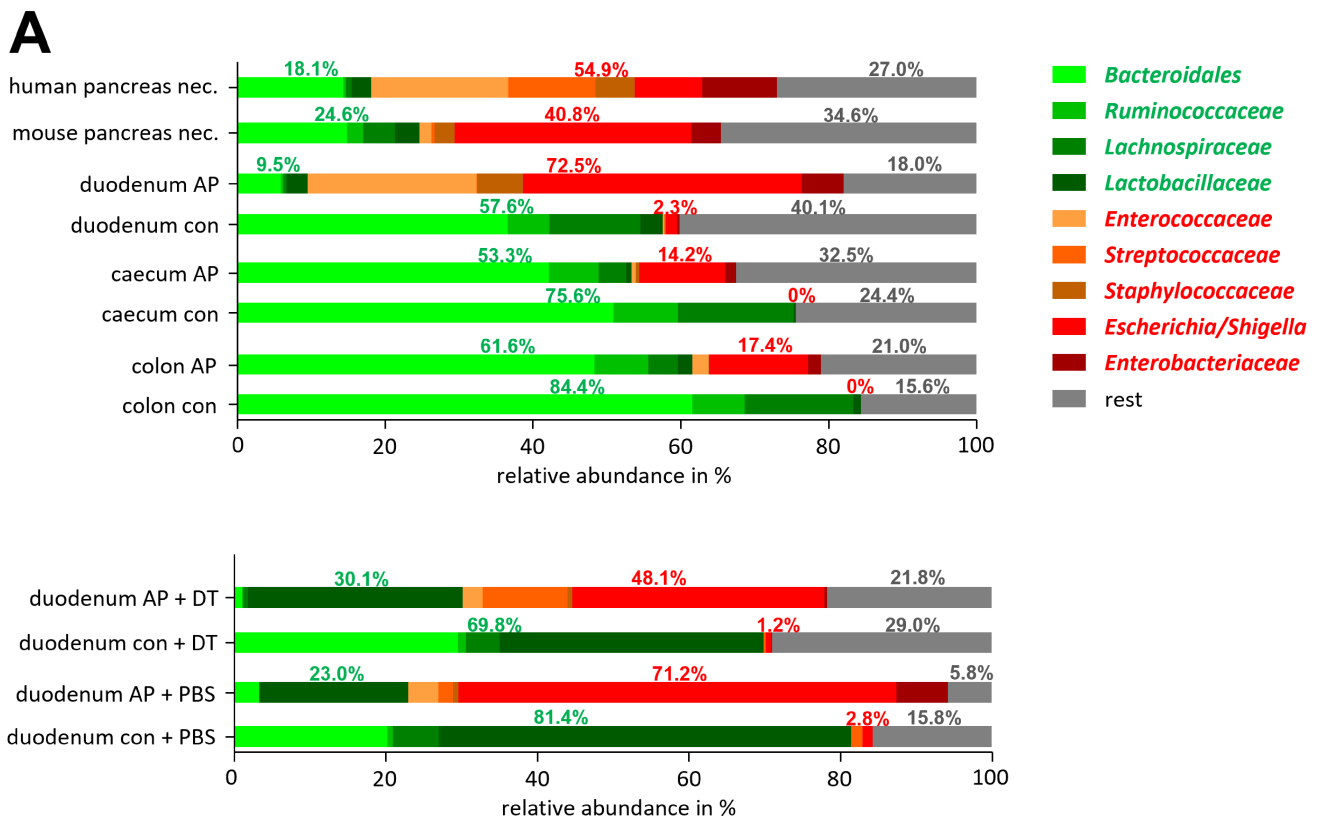

**Figure S15:** Overgrowth of facultative pathogens during AP. Stacked bar graphs of the mean abundances illustrate the overgrowth of facultative pathogens (*Enterobacteriaceae*, *Escherichia/Shigella*, *Staphylococcaceae*, *Streptococcaceae* and *Enterococcaceae*) from colon, caecum and duodenal samples in C57Bl/6 mice during pancreatitis. These taxa also represent the most prominent taxa in murine and human necrosis samples. Depletion of  $T_{regs}$  could not prevent this overgrowth but reduce it.
