# Supplementary material for: Activated regulatory T-cells promote duodenal bacterial translocation into necrotic areas in severe acute pancreatitis
Source: HighWire-hosted journal article supplement (doi:10.1136/gutjnl-2022-327448), 2023-01-11

**A** Model of partial duct ligation induced pancreatitis: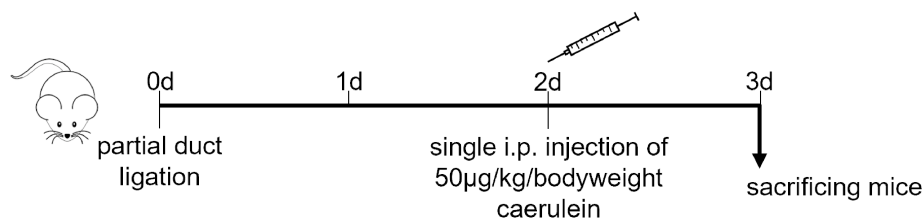**B** Depletion of Tregs: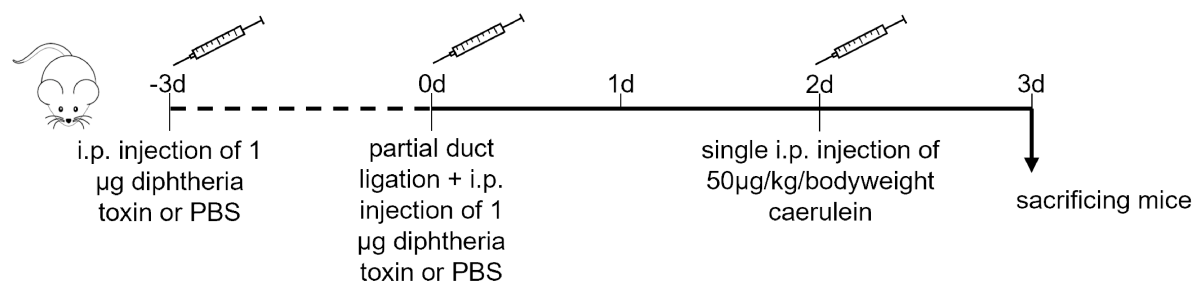**C** Depletion of Tregs + treatment with antibiotics: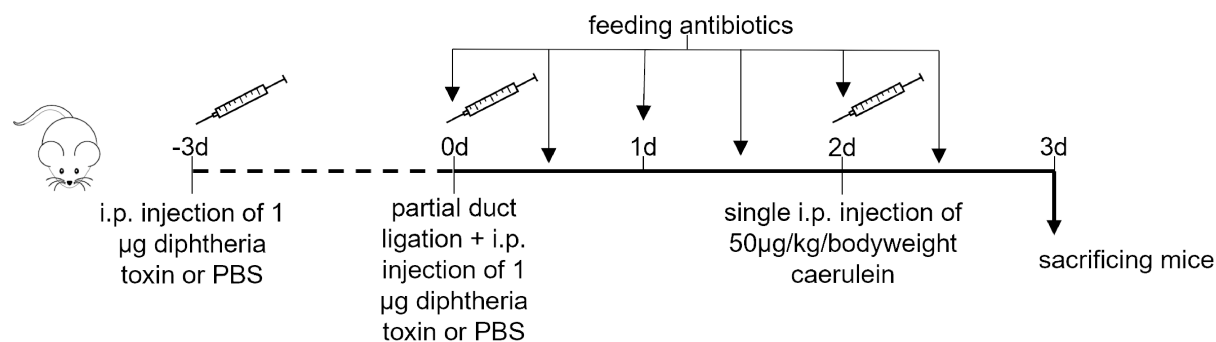**D** Model of caerulein induced pancreatitis over 3d: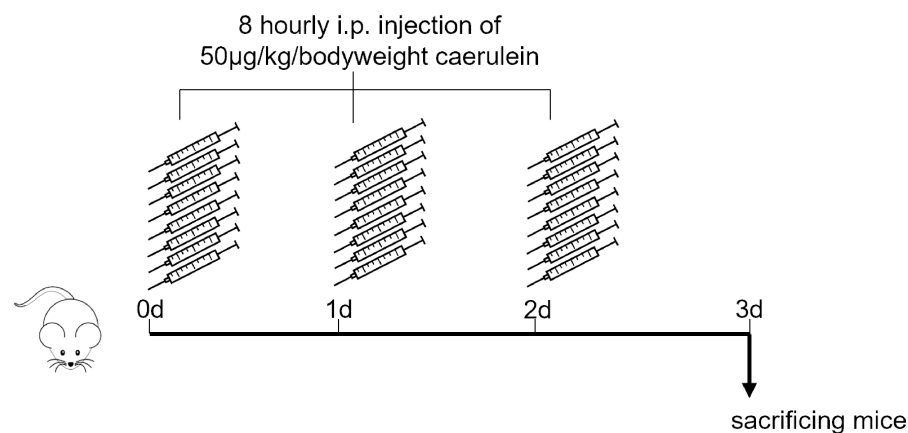

Supplement: gutjnl-2022-327448supp016_data_supplement.pdf [file gutjnl-2022-327448supp016_data_supplement.pdf]
