# Supplementary material for: Activated regulatory T-cells promote duodenal bacterial translocation into necrotic areas in severe acute pancreatitis
Source: HighWire-hosted journal article supplement (doi:10.1136/gutjnl-2022-327448), 2023-01-11
Supplement: gutjnl-2022-327448supp016_data_supplement.pdf [file gutjnl-2022-327448supp016_data_supplement.pdf]

**A** Model of partial duct ligation induced pancreatitis: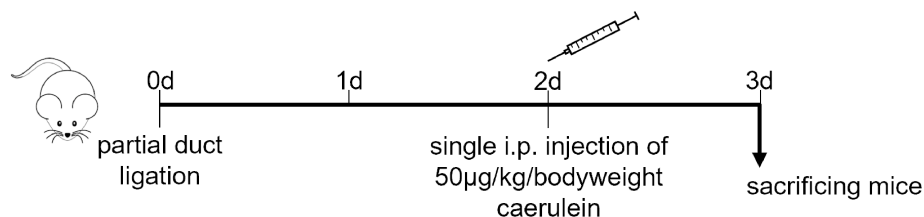**B** Depletion of Tregs: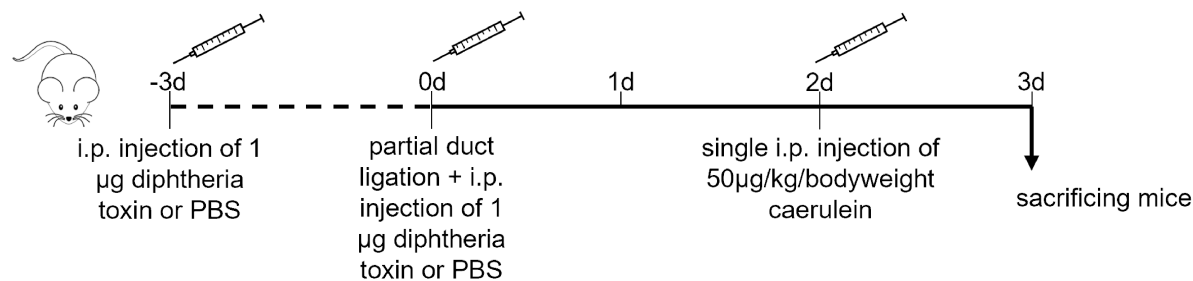**C** Depletion of Tregs + treatment with antibiotics: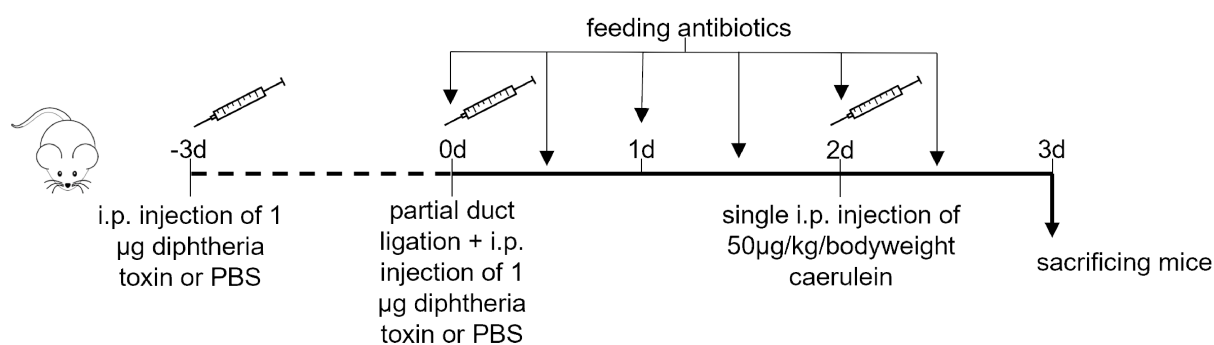**D** Model of caerulein induced pancreatitis over 3d: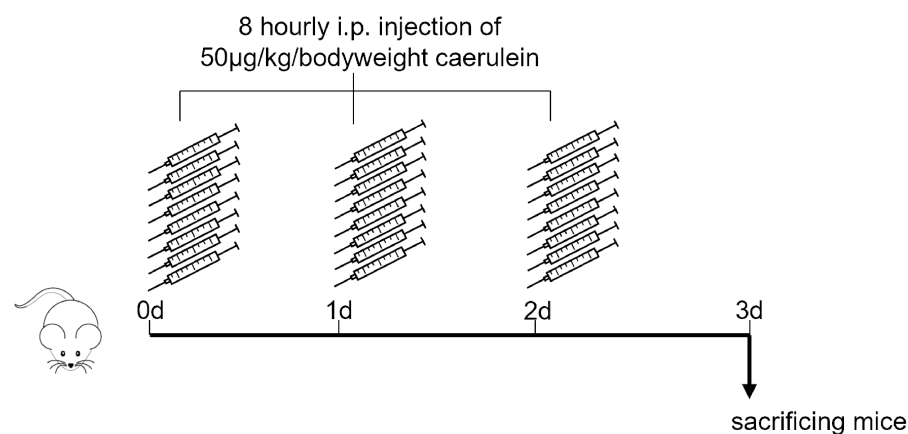

**Figure S16:** Schematic illustration of mouse models of AP. (A) The schematic drawing illustrates the timeline of the AP model by partial pancreatic duct ligation. (B) The timeline illustrates the treatment with diphtheria toxin or PBS to deplete  $T_{regs}$  during AP. (C) The timeline illustrates the treatment with antibiotics in combination with diphtheria toxin or PBS during AP. (D) The Scheme illustrates the second model of AP induced by 8 repetitive caerulein injection for three consecutive days.
