# Supplementary material for: Activated regulatory T-cells promote duodenal bacterial translocation into necrotic areas in severe acute pancreatitis
Source: PubMed Central journal article supplement — Gut. 2023 Jan 11;72(7):1355–69. doi: 10.1136/gutjnl-2022-327448 (PMC10314084; doi:10.1136/gutjnl-2022-327448), 2023-01-11
Supplement: gutjnl-2022-327448supp017.pdf [file gutjnl-2022-327448supp017.pdf]

|                                     | control  |          |          |          |          | moderate |          |          |          |          | severe   |          |          |          |          | Contrast test p value |                  |               |
|-------------------------------------|----------|----------|----------|----------|----------|----------|----------|----------|----------|----------|----------|----------|----------|----------|----------|-----------------------|------------------|---------------|
|                                     | Animal 1 | Animal 2 | Animal 3 | Animal 4 | Animal 5 | Animal 1 | Animal 2 | Animal 3 | Animal 4 | Animal 5 | Animal 1 | Animal 2 | Animal 3 | Animal 4 | Animal 5 | con vs. mod           | con vs. sev      | mod vs. sev   |
| P_Cyanobacteria/Chloroplast         | 0.0000   | 0.0230   | 36.0990  | 1.5464   | 0.0000   | 4.6244   | 0.0689   | 4.8682   | 0.0476   | 19.0207  | 0.0000   | 0.0000   | 0.0000   | 0.0000   | 0.0000   | 0.6326                | 0.052            | 0.1354        |
| F_Acidimicrobiaceae                 | 0.0000   | 0.0000   | 0.0000   | 0.0000   | 0.0000   | 0.0591   | 0.0000   | 0.0000   | 0.0000   | 0.0000   | 0.0000   | 0.0000   | 0.0000   | 0.0000   | 0.048    | 1                     | 0.048            |               |
| O_Coriobacteriales                  | 0.1071   | 0.0197   | 0.0588   | 0.0763   | 0.0888   | 0.0711   | 0.0717   | 0.0000   | 0.0000   | 0.2601   | 0.0000   | 0.0210   | 0.0000   | 0.0000   | 0.0897   | 0.809                 | 0.2708           | 0.1818        |
| O_Gaiellales                        | 0.0000   | 0.0000   | 0.0053   | 0.0000   | 0.0000   | 0.0784   | 0.0000   | 0.0000   | 0.0000   | 0.0000   | 0.0000   | 0.0000   | 0.0000   | 0.0000   | 0.0000   | 0.0563                | 0.886            | 0.0413        |
| O_Actinomycetales                   | 0.0197   | 0.0856   | 1.2216   | 0.2691   | 0.2186   | 1.3795   | 0.7501   | 0.0234   | 0.0693   | 1.3015   | 0.0960   | 0.0000   | 0.0216   | 0.0000   | 0.0000   | 0.054                 | 0.0556           | <b>0.0003</b> |
| F_Prevotellaceae                    | 0.1493   | 0.4706   | 0.6896   | 6.2942   | 0.8541   | 1.1781   | 0.5502   | 0.0070   | 0.2815   | 0.9235   | 0.0120   | 0.0000   | 0.0000   | 0.0000   | 0.0000   | 0.4111                | 0.2115           | 0.6622        |
| F_Rikenellaceae                     | 0.0676   | 0.7668   | 0.4304   | 4.9406   | 0.5840   | 1.5821   | 0.5116   | 0.0000   | 0.3465   | 0.9646   | 0.0200   | 0.0000   | 0.0000   | 0.0000   | 0.0000   | 0.7052                | 0.4207           | 0.7052        |
| G_Bacteroides                       | 0.0310   | 0.3883   | 0.3475   | 3.7596   | 0.6421   | 1.4892   | 0.7570   | 0.0164   | 0.1992   | 0.7708   | 0.0000   | 2.5824   | 0.0000   | 0.0150   | 0.0256   | 0.802                 | 0.7417           | 0.937         |
| F_Marinilibacteriaceae              | 8.6085   | 4.6466   | 1.8417   | 3.5186   | 4.3239   | 0.0880   | 0.0993   | 0.0000   | 0.0217   | 0.0390   | 0.0000   | 7.2223   | 0.0000   | 0.0000   | 0.0897   | <b>&lt;.0001</b>      | <b>0.0018</b>    | 0.1373        |
| F_Porphyromonadaceae                | 14.7064  | 16.4407  | 4.4105   | 11.2588  | 12.2409  | 1.2432   | 0.8149   | 0.1337   | 0.1949   | 1.0562   | 0.0640   | 1.5396   | 0.0518   | 0.0100   | 0.0513   | <b>&lt;.0001</b>      | <b>&lt;.0001</b> | 0.855         |
| O_Bacteroidales_NA                  | 44.2347  | 36.6395  | 10.0478  | 23.3893  | 29.2223  | 2.5106   | 1.0783   | 0.0000   | 0.4418   | 1.3110   | 0.0520   | 14.2697  | 0.0000   | 0.0100   | 0.0385   | <b>&lt;.0001</b>      | <b>&lt;.0001</b> | 0.6506        |
| O_Cytophagales                      | 0.0000   | 0.0000   | 0.0000   | 0.0000   | 0.0000   | 0.0711   | 0.0000   | 0.0000   | 0.0000   | 0.0000   | 0.0000   | 0.0000   | 0.0000   | 0.0000   | 0.0000   | 0.0408                | 1                | 0.0408        |
| F_Flavobacteriaceae                 | 0.0000   | 0.0000   | 0.0214   | 0.0000   | 0.0000   | 0.0675   | 0.3778   | 0.0000   | 0.0000   | 0.0906   | 0.0000   | 0.0000   | 0.0000   | 0.0000   | 0.0000   | <b>0.0036</b>         | 0.8978           | <b>0.0026</b> |
| G_Bacteroidetes_NA                  | 0.7721   | 0.5825   | 0.2219   | 0.5784   | 0.6250   | 0.0000   | 0.0000   | 0.0000   | 0.0000   | 0.0242   | 0.0000   | 0.0000   | 0.0000   | 0.0000   | 0.0000   | 0.1061                | 0.1031           | 0.9885        |
| F_Bacillaceae                       | 0.0000   | 0.0000   | 0.0321   | 0.0000   | 0.0000   | 0.0000   | 0.1227   | 0.0000   | 0.0000   | 0.0232   | 0.0000   | 0.0000   | 0.0000   | 0.0000   | 0.0000   | 0.058                 | 0.5845           | 0.0167        |
| O_Bacillales div.                   | 0.0000   | 0.0000   | 0.0080   | 0.0000   | 0.0000   | 0.1013   | 0.0000   | 0.0000   | 0.0000   | 0.0716   | 0.0000   | 0.0000   | 0.0000   | 0.0000   | 0.0000   | <b>0.0027</b>         | <b>0.8766</b>    | <b>0.0018</b> |
| G_Staphylococcus                    | 0.0000   | 0.0165   | 0.1577   | 0.0000   | 0.0000   | 2.4454   | 9.1644   | 0.4995   | 6.7524   | 0.3917   | 4.8958   | 0.3289   | 4.2574   | 4.3726   | 2.5643   | <b>0.0002</b>         | <b>0.0013</b>    | 0.5454        |
| F_Carnobacteriaceae                 | 0.0000   | 0.0000   | 0.0401   | 0.0000   | 0.0000   | 0.0000   | 0.0290   | 0.0000   | 0.0000   | 0.0621   | 0.0000   | 0.0000   | 0.0000   | 0.0000   | 0.0000   | 0.15                  | 0.255            | 0.0126        |
| G_Lactobacillus                     | 8.3296   | 7.9768   | 5.0520   | 0.4981   | 0.4782   | 2.6191   | 0.7501   | 2.2746   | 6.3236   | 5.1461   | 0.2240   | 0.5319   | 0.0647   | 5.3670   | 3.8272   | 0.5001                | 0.1167           | 0.3605        |
| F_Leuconostocaceae                  | 0.0000   | 0.0000   | 0.0267   | 0.0000   | 0.0000   | 0.0000   | 0.0000   | 0.0000   | 0.0000   | 0.0916   | 0.0000   | 0.0000   | 0.0000   | 0.0000   | 0.0000   | 0.1579                | 0.5561           | 0.0491        |
| G_Lactococcus                       | 0.0000   | 0.0000   | 0.0722   | 0.0000   | 0.0000   | 0.0567   | 0.1200   | 0.0000   | 0.0000   | 0.0727   | 0.0000   | 0.0000   | 0.0000   | 0.0000   | 0.0000   | <b>0.0086</b>         | 0.2649           | <b>0.0004</b> |
| G_Streptococcus                     | 0.0000   | 0.0263   | 0.1577   | 0.0321   | 0.0000   | 0.3171   | 0.0634   | 0.0000   | 0.0000   | 0.3643   | 0.0000   | 0.0000   | 0.0000   | 0.0000   | 0.0000   | 0.012                 | 0.2863           | <b>0.0007</b> |
| G_Enterococcus                      | 0.0000   | 0.0132   | 0.3715   | 0.0321   | 0.0000   | 1.6641   | 21.2603  | 43.1057  | 11.2699  | 0.7877   | 33.0227  | 6.3755   | 37.3248  | 24.5665  | 8.7954   | <b>0.0023</b>         | <b>&lt;.0001</b> | 0.1858        |
| F_Clostridiales_Incertae_Sedis_XIII | 0.0451   | 0.0658   | 0.0535   | 0.0844   | 0.0717   | 0.1821   | 0.1117   | 0.0000   | 0.0000   | 0.0130   | 0.1190   | 0.0000   | 0.0000   | 0.0000   | 0.0000   | 0.8999                | 0.7022           | 0.6118        |
| O_Clostridiales_NA                  | 1.5639   | 2.6359   | 0.1550   | 3.3299   | 5.5057   | 0.7259   | 0.2675   | 0.0000   | 0.1689   | 0.3475   | 0.0000   | 0.0000   | 0.0000   | 0.0000   | 0.0000   | 0.7515                | 0.7207           | 0.9673        |
| G_Acetatifactor                     | 0.0141   | 0.0395   | 0.0428   | 0.1366   | 0.1298   | 0.0398   | 0.1200   | 0.0000   | 0.0000   | 0.0453   | 0.0000   | 0.0000   | 0.0000   | 0.0000   | 0.0000   | 0.3986                | 0.0571           | 0.274         |
| G_Acetitomaculum                    | 0.1127   | 0.2304   | 0.0802   | 0.0763   | 0.2220   | 0.0000   | 0.0000   | 0.0000   | 0.0000   | 0.0000   | 0.0000   | 0.0000   | 0.0000   | 0.0000   | 0.0000   | <b>&lt;.0001</b>      | <b>&lt;.0001</b> | 1             |
| G_Anaerostipes                      | 0.6227   | 0.5825   | 0.1016   | 0.2249   | 2.5547   | 0.0000   | 0.0000   | 0.0000   | 0.0000   | 0.0000   | 0.0080   | 0.0000   | 0.0000   | 0.0000   | 0.0000   | <b>0.0006</b>         | <b>0.0006</b>    | 0.9942        |
| G_Blaeutia                          | 0.0113   | 0.0000   | 0.0160   | 0.0161   | 0.0683   | 0.0096   | 0.0000   | 0.0000   | 0.0000   | 0.0821   | 0.0000   | 0.0000   | 0.0000   | 0.0000   | 0.0000   | 0.7975                | 0.1555           | 0.241         |
| G_Butyriivibrio                     | 0.0113   | 0.0165   | 0.1283   | 0.6668   | 0.0717   | 0.0350   | 0.0000   | 0.0000   | 0.0000   | 0.0000   | 0.0000   | 0.0000   | 0.0000   | 0.0000   | 0.0000   | 0.2999                | 0.281            | 0.9661        |
| G_Clostridium_XIVa/XIVb             | 0.5044   | 3.2579   | 0.2085   | 0.3093   | 1.0246   | 0.0772   | 0.0234   | 0.0000   | 0.0000   | 0.0000   | 0.0000   | 0.0000   | 0.0000   | 0.0000   | 0.0000   | <b>0.0009</b>         | <b>0.0007</b>    | 0.9444        |
| G_Eisenbergiella                    | 0.8454   | 0.0625   | 1.0505   | 0.6306   | 1.2569   | 0.2026   | 0.0303   | 0.0000   | 0.0130   | 0.2232   | 0.0000   | 0.0000   | 0.0000   | 0.0000   | 0.0000   | 0.6056                | 0.5578           | 0.9429        |
| G_Hungatella                        | 0.2198   | 0.0000   | 0.0000   | 0.0442   | 0.3245   | 0.0386   | 0.0000   | 0.0000   | 0.0000   | 0.0000   | 0.0000   | 0.0000   | 0.0000   | 0.0000   | 0.0000   | 0.022                 | 0.0148           | 0.8676        |
| G_Marvinbryantia                    | 0.1155   | 0.1382   | 0.1069   | 0.1888   | 0.0751   | 0.0000   | 0.0000   | 0.0000   | 0.0000   | 0.0000   | 0.0080   | 0.0000   | 0.0000   | 0.0000   | 0.0000   | 0.1728                | 0.1782           | 0.9859        |
| G_Roseburia                         | 0.1014   | 0.0000   | 0.0374   | 0.0000   | 0.1913   | 0.0265   | 0.0000   | 0.0000   | 0.0000   | 0.0000   | 0.0000   | 0.0000   | 0.0000   | 0.0000   | 0.0000   | 0.1725                | 0.1389           | 0.9039        |
| P_Lachnospiraceae div.              | 0.0000   | 0.0296   | 0.0000   | 0.0201   | 0.0581   | 0.0880   | 0.0000   | 0.0000   | 0.0000   | 0.0495   | 0.0000   | 0.0000   | 0.0000   | 0.0000   | 0.0000   | 0.8446                | 0.4793           | 0.3678        |
| F_Lachnospiraceae_NA                | 6.7628   | 8.5758   | 1.5263   | 15.3278  | 18.5355  | 1.1962   | 0.2744   | 0.0047   | 0.0347   | 1.0793   | 0.0120   | 0.0000   | 0.0000   | 0.0000   | 0.0000   | <b>0.0003</b>         | <b>0.0002</b>    | 0.8328        |
| G_Acetanaerobacterium               | 0.1296   | 0.2896   | 0.0267   | 0.0442   | 0.1332   | 0.1435   | 0.0000   | 0.0000   | 0.0000   | 0.0000   | 0.0000   | 0.0000   | 0.0000   | 0.0000   | 0.0000   | 0.035                 | <b>0.0073</b>    | 0.5166        |
| G_Anaerotruncus                     | 3.4800   | 3.9983   | 0.2887   | 1.3255   | 5.1026   | 0.1459   | 0.3047   | 0.0000   | 0.0130   | 0.0190   | 0.0000   | 0.0000   | 0.0000   | 0.0150   | 0.0000   | <b>0.0001</b>         | <b>0.0001</b>    | 0.8825        |
| G_Butyricoccus                      | 0.0451   | 0.7536   | 0.0241   | 0.0924   | 0.7002   | 0.0000   | 0.0000   | 0.0000   | 0.0000   | 0.0000   | 0.0000   | 0.0000   | 0.0000   | 0.0000   | 0.0000   | <b>0.0003</b>         | <b>0.0003</b>    | 1             |
| G_Flavonifractor                    | 0.0845   | 0.2271   | 0.0347   | 0.1044   | 0.1298   | 0.0265   | 0.0483   | 0.0000   | 0.0000   | 0.0200   | 0.0000   | 0.0000   | 0.0000   | 0.0000   | 0.0000   | 0.02                  | <b>0.0062</b>    | 0.6377        |
| G_Intestinimonas                    | 0.0592   | 0.1612   | 0.1149   | 0.5985   | 0.1469   | 0.6258   | 0.0248   | 0.0000   | 0.0000   | 0.0937   | 0.0000   | 0.0000   | 0.0000   | 0.0000   | 0.0000   | 0.7162                | 0.2469           | 0.4228        |
| G_Oscillibacter                     | 0.2254   | 0.1580   | 0.1470   | 0.7069   | 0.4543   | 0.7657   | 0.0290   | 0.0000   | 0.0347   | 0.3149   | 0.0000   | 0.0000   | 0.0000   | 0.0000   | 0.0000   | 0.7914                | 0.4157           | 0.581         |
| G_Pseudoflavonifractor              | 0.0620   | 0.3686   | 0.0401   | 0.5503   | 0.7855   | 0.5860   | 0.0938   | 0.0000   | 0.0000   | 0.0432   | 0.0000   | 0.0000   | 0.0000   | 0.0000   | 0.0000   | 0.4128                | 0.1756           | 0.5837        |
| F_Ruminococcaceae div.              | 0.0564   | 0.0395   | 0.0454   | 0.5342   | 0.1571   | 0.0000   | 0.0000   | 0.0000   | 0.0000   | 0.0000   | 0.0000   | 0.0000   | 0.0000   | 0.0000   | 0.0000   | 0.6415                | 0.6415           | 1             |
| F_Ruminococcaceae_NA                | 2.3473   | 2.2772   | 0.2780   | 4.7518   | 4.2966   | 0.7946   | 0.2716   | 0.0000   | 0.0390   | 0.2306   | 0.0000   | 0.0000   | 0.0000   | 0.0000   | 0.0000   | <b>0.0077</b>         | <b>0.0036</b>    | 0.7668        |
| F_Erysipelotrichaceae               | 0.7214   | 0.7668   | 0.1711   | 0.4298   | 1.3286   | 1.3047   | 0.3640   | 0.0375   | 0.1256   | 0.5834   | 0.1040   | 0.3569   | 0.0302   | 0.7196   | 1.7245   | 0.8862                | 0.9451           | 0.9408        |
| P_Firmicutes_NA                     | 0.2705   | 0.7371   | 0.0882   | 0.1687   | 0.6387   | 0.0892   | 0.0152   | 0.0000   | 0.0000   | 0.0516   | 0.0000   | 0.0000   | 0.0000   | 0.0000   | 0.0000   | 0.1269                | 0.0973           | 0.8898        |
| O_Fusobacteriales                   | 0.0000   | 0.0000   | 0.0000   | 0.0080   | 0.0000   | 0.1254   | 0.0124   | 0.0000   | 0.0217   | 0.0126   | 0.0000   | 0.0000   | 0.0000   | 0.0000   | 0.0000   | <b>0.0046</b>         | 0.8833           | <b>0.0031</b> |
| F_Caulobacteraceae                  | 0.0000   | 0.0000   | 0.0053   | 0.0281   | 0.0000   | 0.0000   | 0.0000   | 0.0000   | 0.0000   | 0.0095   | 0.0000   | 0.0000   | 0.0000   | 0.0000   | 0.0000   | 0.0865                | 0.0189           | 0.4908        |
| O_Rhizobiales                       | 0.0733   | 0.1711   | 3.6914   | 1.4299   | 0.2459   | 0.9972   | 1.4920   | 0.1735   |          |          |          |          |          |          |          |                       |                  |               |
