# Supplementary material for: Activated regulatory T-cells promote duodenal bacterial translocation into necrotic areas in severe acute pancreatitis
Source: PubMed Central journal article supplement — Gut. 2023 Jan 11;72(7):1355–69. doi: 10.1136/gutjnl-2022-327448 (PMC10314084; doi:10.1136/gutjnl-2022-327448), 2023-01-11
Supplement: gutjnl-2022-327448supp018.pdf [file gutjnl-2022-327448supp018.pdf]

|                          | PBS     |         |         |         |        |         |         |         |         |         | DT      |         |         |         |         |         |         |         |         |         | p-value DT vs PBS |         |         |         |        |
|--------------------------|---------|---------|---------|---------|--------|---------|---------|---------|---------|---------|---------|---------|---------|---------|---------|---------|---------|---------|---------|---------|-------------------|---------|---------|---------|--------|
|                          | con     | con     | con     | con     | AP     | AP      | AP      | AP      | AP      | AP      | con     | con     | con     | con     | AP      | AP      | AP      | AP      | AP      | AP      |                   |         |         |         |        |
| F_Coriobacteriaceae      | 0.3132  | 0.8419  | 0.1924  | 0.0000  | 0.0000 | 0.0000  | 0.0000  | 0.0000  | 0.0054  | 0.0061  | 0.0000  | 0.0000  | 0.2589  | 0.5097  | 0.3143  | 0.3905  | 0.0000  | 0.0547  | 0.0355  | 0.0000  | 0.0000            | 0.1495  | 0.5030  | 0.0000  | 0.2382 |
| F_Corynebacteriaceae     | 0.0000  | 0.0000  | 0.0000  | 0.0579  | 0.0000 | 0.0000  | 0.0000  | 0.0000  | 0.0000  | 0.0122  | 0.1029  | 0.1398  | 0.0000  | 0.0000  | 0.0000  | 0.0000  | 1.0419  | 0.3751  | 0.0903  | 12.4376 | 0.6496            | 1.1931  | 8.2340  | 1.0921  | 0.0319 |
| F_Micrococcaceae         | 0.0000  | 0.0000  | 0.0000  | 0.0000  | 0.0000 | 0.0000  | 0.0000  | 0.7488  | 1.5163  | 11.1403 | 0.0000  | 0.0000  | 0.0000  | 0.0000  | 0.0000  | 0.0000  | 0.0086  | 0.0000  | 0.0000  | 0.0000  | 0.0000            | 0.0000  | 0.0000  | 0.0000  | 0.1614 |
| F_Propionibacteriaceae   | 0.0000  | 0.0093  | 0.0000  | 0.0652  | 0.0000 | 0.0000  | 0.0000  | 0.0000  | 0.0000  | 0.0214  | 0.0000  | 0.0336  | 0.0095  | 0.0000  | 0.0000  | 0.0379  | 0.0144  | 0.0000  | 0.0177  | 0.0807  | 0.1224            | 0.0000  | 0.2581  | 0.3077  | 0.0099 |
| C_Actinobacteria div.    | 0.0000  | 0.0000  | 0.0000  | 0.1666  | 0.0000 | 0.0000  | 0.0000  | 0.0000  | 0.0000  | 0.0000  | 0.0243  | 0.0093  | 0.0000  | 0.0000  | 0.0000  | 0.0117  | 0.0689  | 0.0000  | 0.0177  | 0.0807  | 0.1224            | 0.0000  | 0.2581  | 0.3077  | 0.0099 |
| P_Bacteroidetes_NA       | 13.3474 | 11.0012 | 3.6826  | 3.3464  | 0.0000 | 0.0000  | 0.0000  | 0.0000  | 0.0135  | 0.0122  | 0.0000  | 0.0429  | 14.2084 | 16.1071 | 14.3020 | 12.8843 | 0.0258  | 0.0676  | 0.0097  | 0.0219  | 0.0612            | 0.2768  | 1.0557  | 0.1482  | 0.8594 |
| O_Flavobacteriales       | 0.0000  | 0.0000  | 0.0000  | 0.3622  | 0.0000 | 0.0000  | 0.0000  | 0.0000  | 0.0000  | 0.0000  | 0.0000  | 0.0056  | 0.0000  | 0.0000  | 0.0000  | 0.0117  | 0.0287  | 0.0000  | 0.0064  | 0.0219  | 0.0626            | 0.0000  | 0.1489  | 0.0437  | 0.2272 |
| F_Rikenellaceae          | 0.0000  | 0.0700  | 0.0000  | 0.0000  | 0.0000 | 0.0000  | 0.0000  | 0.0000  | 0.0000  | 0.0000  | 0.0306  | 0.0000  | 0.0000  | 0.0333  | 0.1617  | 0.0054  | 0.0000  | 0.0000  | 0.0000  | 0.0000  | 0.0262            | 0.0194  | 0.2813  | 0.0000  | 0.2827 |
| F_Prevotellaceae         | 0.0176  | 0.0000  | 0.0000  | 0.0000  | 0.0000 | 0.0000  | 0.0000  | 0.0000  | 0.0000  | 0.0000  | 0.0000  | 0.0029  | 0.0000  | 0.0784  | 0.0352  | 0.0000  | 0.0000  | 0.0000  | 0.0000  | 0.0000  | 0.0000            | 0.0000  | 0.2515  | 0.0000  | 0.2764 |
| F_Porphyrimonadaceae     | 8.2969  | 6.3017  | 3.4713  | 1.5501  | 0.0000 | 0.0000  | 0.2015  | 0.0000  | 1.1487  | 0.0520  | 0.0057  | 0.1771  | 10.2109 | 10.6127 | 10.4894 | 9.2181  | 0.0316  | 0.9756  | 0.0774  | 0.0000  | 0.0350            | 0.6207  | 1.3635  | 0.0779  | 0.7991 |
| O_Bacteroidales_NA       | 15.3015 | 21.6153 | 7.5048  | 2.7524  | 0.0000 | 0.0000  | 0.0000  | 0.0091  | 4.0436  | 0.0520  | 0.0043  | 0.0037  | 19.1226 | 15.0455 | 12.9498 | 12.3831 | 0.0000  | 0.1095  | 0.0467  | 0.0092  | 0.0422            | 0.2104  | 1.7342  | 0.0380  | 0.8688 |
| F_Marinilabiales         | 4.3227  | 6.0009  | 2.4073  | 1.0503  | 0.0000 | 0.0000  | 0.0000  | 0.0272  | 1.0163  | 0.0612  | 0.0000  | 0.0056  | 4.0521  | 4.1656  | 3.4630  | 5.9948  | 0.0000  | 0.0467  | 0.0097  | 0.0277  | 0.0189            | 0.2076  | 0.8141  | 0.0209  | 0.9915 |
| G_Bacteroides            | 0.0000  | 0.0000  | 0.0000  | 0.0000  | 0.0000 | 2.7856  | 0.0998  | 15.9283 | 0.4068  | 0.1386  | 0.1921  | 0.0000  | 0.0211  | 0.0000  | 0.0000  | 0.0000  | 0.0000  | 0.0000  | 0.0000  | 0.0000  | 0.0262            | 0.0138  | 1.4264  | 0.0874  | 0.1897 |
| F_Eysinielotrichaceae    | 0.0618  | 0.1259  | 0.0151  | 0.0000  | 0.0000 | 0.1656  | 1.0801  | 0.1000  | 0.6240  | 0.1372  | 0.0000  | 1.0071  | 2.4326  | 1.8968  | 0.4634  | 0.0431  | 0.1336  | 0.0000  | 0.0000  | 0.0000  | 0.0000            | 4.7615  | 0.7182  | 0.0152  | 0.4378 |
| G_Anerotruncus           | 0.0000  | 0.0396  | 0.0641  | 0.0000  | 0.0000 | 0.0000  | 0.0000  | 0.0000  | 0.0000  | 0.0000  | 0.0000  | 0.0075  | 0.0523  | 0.1266  | 0.0108  | 0.0204  | 0.0000  | 0.0161  | 0.0000  | 0.0000  | 0.0000            | 0.0083  | 0.0000  | 0.0000  | 0.8596 |
| G_Butyricoccus           | 0.0485  | 0.0723  | 0.1094  | 0.0362  | 0.0000 | 0.0000  | 0.0000  | 0.0000  | 0.0000  | 0.0000  | 0.0000  | 0.0075  | 0.0499  | 0.0914  | 0.0244  | 0.0000  | 0.0000  | 0.0290  | 0.0000  | 0.0000  | 0.0000            | 0.0166  | 0.0000  | 0.0000  | 0.6138 |
| G_Oscillibacter          | 0.0529  | 0.0117  | 0.4981  | 0.0217  | 0.0000 | 0.0000  | 0.0000  | 0.0000  | 0.0000  | 0.0000  | 0.0000  | 0.0000  | 0.0000  | 0.0736  | 0.0492  | 0.0081  | 0.1341  | 0.0000  | 0.0451  | 0.0000  | 0.0000            | 0.0364  | 0.0000  | 0.0165  | 0.6702 |
| G_Pseudoflavonifactor    | 0.0662  | 0.0000  | 0.0604  | 0.0652  | 0.0000 | 0.0000  | 0.0000  | 0.0000  | 0.0000  | 0.0000  | 0.0000  | 0.0000  | 0.0000  | 0.0760  | 0.1582  | 0.0108  | 0.0204  | 0.0000  | 0.0000  | 0.0000  | 0.0000            | 0.0000  | 0.0165  | 0.0209  | 0.7498 |
| G_Grostridium_IV         | 0.3793  | 0.0140  | 0.0000  | 0.1521  | 0.0000 | 0.0000  | 0.0000  | 0.0000  | 0.0000  | 0.0000  | 0.0000  | 0.0000  | 0.1663  | 0.1441  | 0.0217  | 0.0262  | 0.0000  | 0.0097  | 0.0000  | 0.0000  | 0.0000            | 0.0000  | 0.0000  | 0.0000  | 0.9676 |
| F_Ruminococcaceae_NA     | 0.1544  | 1.2011  | 0.0868  | 0.0579  | 0.0000 | 0.0000  | 0.0000  | 0.0000  | 0.0000  | 0.0000  | 0.0000  | 0.0000  | 0.0000  | 0.8171  | 1.3745  | 0.3225  | 0.3643  | 0.0086  | 0.0467  | 0.0000  | 0.0000            | 0.0379  | 0.0000  | 0.0352  | 0.6651 |
| G_Eisenbergiella         | 0.0265  | 0.2332  | 0.7207  | 0.0579  | 0.0000 | 0.0108  | 0.0144  | 0.0000  | 0.0000  | 0.0000  | 0.0000  | 0.0429  | 0.2826  | 2.0318  | 0.9863  | 2.6229  | 0.0000  | 0.1095  | 0.0000  | 0.0115  | 0.0000            | 0.7917  | 0.0827  | 0.0000  | 0.6677 |
| G_Fuscatenabacter        | 0.2073  | 0.1959  | 0.8301  | 0.0652  | 0.0000 | 0.0000  | 0.0000  | 0.0000  | 0.0000  | 0.0000  | 0.0000  | 0.3226  | 0.1259  | 0.2918  | 0.1626  | 0.3701  | 0.0000  | 0.3896  | 0.0000  | 0.0000  | 0.0000            | 0.0000  | 0.0199  | 0.0000  | 0.8879 |
| G_Hungatella             | 0.0706  | 0.1936  | 0.0377  | 0.0000  | 0.0000 | 0.0000  | 0.0000  | 0.0000  | 0.0000  | 0.0000  | 0.0000  | 0.0000  | 0.0000  | 0.1898  | 0.0786  | 0.0495  | 0.0000  | 0.0419  | 0.0000  | 0.0000  | 0.0000            | 0.0277  | 0.0000  | 0.0000  | 0.6736 |
| G_Marvinbryantia         | 0.2382  | 0.3009  | 0.0302  | 0.0000  | 0.0000 | 0.0000  | 0.0000  | 0.0000  | 0.0000  | 0.0000  | 0.0000  | 0.0000  | 0.5035  | 0.6433  | 0.4850  | 0.1603  | 0.0000  | 0.0000  | 0.0000  | 0.0000  | 0.0000            | 0.0083  | 0.0563  | 0.0000  | 0.89   |
| G_Robinsoniella          | 0.0000  | 0.0000  | 0.0000  | 0.0000  | 0.0000 | 0.0000  | 0.0000  | 0.0000  | 0.0000  | 0.0000  | 0.0000  | 0.0000  | 0.0000  | 0.0000  | 0.0000  | 0.0000  | 0.0000  | 0.0000  | 0.0000  | 0.0000  | 0.2010            | 0.0000  | 2.4788  | 0.0000  | 0.2188 |
| G_Roseburia              | 0.0000  | 0.1516  | 0.0189  | 0.0000  | 0.0000 | 0.0000  | 0.0000  | 0.0000  | 0.0000  | 0.0000  | 0.0000  | 0.0056  | 0.0889  | 0.0000  | 0.0000  | 0.0000  | 0.0000  | 0.0193  | 0.0000  | 0.0000  | 0.0000            | 0.0000  | 0.0000  | 0.0000  | 0.8947 |
| G_Ruminococcus2          | 0.1720  | 0.5271  | 0.0000  | 0.0000  | 0.0000 | 0.0000  | 0.0000  | 0.0000  | 0.0000  | 0.0000  | 0.0000  | 0.0000  | 0.0428  | 0.3515  | 0.0732  | 0.0117  | 0.0000  | 0.0000  | 0.0000  | 0.0000  | 0.0000            | 0.0000  | 0.0000  | 0.0133  | 0.9721 |
| G_Grostridium_XIva       | 0.0265  | 0.0373  | 0.0264  | 0.0000  | 0.0000 | 0.0000  | 0.0000  | 0.0000  | 0.0000  | 0.0000  | 0.0000  | 0.0000  | 0.1164  | 0.3550  | 0.0325  | 0.0000  | 0.0000  | 0.0000  | 0.0000  | 0.0000  | 0.0000            | 0.0000  | 0.0000  | 0.0000  | 1      |
| F_Lachnospiraceae div.   | 2.6024  | 10.4975 | 6.2219  | 0.8547  | 0.0000 | 0.0000  | 0.0000  | 0.0000  | 0.0061  | 0.0000  | 0.1790  | 2.9904  | 2.5521  | 0.7479  | 1.8856  | 0.0000  | 0.2866  | 0.0000  | 0.0000  | 0.0000  | 0.1273            | 0.6189  | 0.0285  | 0.8801  |        |
| O_Clostridiales_NA       | 1.2130  | 3.8086  | 0.6603  | 0.3404  | 0.0000 | 0.0000  | 0.0000  | 0.0000  | 0.0000  | 0.0000  | 0.0000  | 0.0485  | 1.4251  | 1.6944  | 0.4119  | 0.3556  | 0.0000  | 0.1578  | 0.0000  | 0.0058  | 0.0000            | 0.0055  | 0.2548  | 0.0000  | 0.8625 |
| F_Clostridiaceae_1       | 0.0000  | 0.0000  | 0.0000  | 0.0000  | 0.5524 | 0.0000  | 0.0000  | 0.0000  | 0.0000  | 0.0000  | 0.0000  | 0.0075  | 3.2564  | 2.9634  | 2.8859  | 2.7453  | 0.0000  | 0.0547  | 0.0113  | 0.0000  | 0.0408            | 0.0000  | 0.0066  | 0.0266  | 0.8808 |
| C_Clostridia div.        | 0.0000  | 0.0000  | 0.0151  | 0.0000  | 0.0000 | 0.0000  | 0.0000  | 0.0000  | 0.0000  | 0.0000  | 0.0000  | 0.0000  | 0.1425  | 0.0176  | 0.0000  | 0.0000  | 0.0086  | 0.0000  | 0.0032  | 0.0219  | 0.0000            | 0.0000  | 0.0331  | 0.0931  | 0.255  |
| G_Enterococcus           | 0.0000  | 0.0000  | 0.0000  | 15.1915 | 0.0000 | 0.0792  | 6.5302  | 4.2457  | 1.5303  | 3.1774  | 0.0000  | 0.0000  | 0.0000  | 0.0000  | 0.0000  | 0.0000  | 3.0225  | 10.7335 | 2.3177  | 0.5592  | 0.2884            | 0.0000  | 4.4050  | 0.0399  | 0.5227 |
| G_Lactobacillus          | 44.6473 | 28.1130 | 65.6756 | 78.9005 | 9.1243 | 33.4659 | 20.5643 | 17.7800 | 17.4095 | 8.9135  | 32.0816 | 17.6136 | 33.0151 | 29.0294 | 44.4396 | 32.5125 | 32.5727 | 15.0304 | 30.1926 | 9.3648  | 37.9561           | 21.5790 | 20.0920 | 59.6744 | 0.2149 |
| G_Streptococcus          | 0.6660  | 0.1936  | 0.5660  | 4.7081  | 0.0534 | 0.2473  | 8.3999  | 0.0000  | 0.0000  | 7.0259  | 0.1231  | 0.0784  | 0.0984  | 0.0623  | 1.0025  | 4.3113  | 0.3043  | 10.6117 | 15.3801 | 16.8500 | 11.5162           | 13.7444 | 16.7050 | 0.0001  | 0.0001 |
| O_Lactobacillales div.   | 0.0000  | 0.0233  | 0.0000  | 0.0000  | 0.0000 | 0.0000  | 0.0000  | 0.0000  | 0.0000  | 0.0186  | 0.0000  | 0.0000  | 0.0000  | 0.0000  | 0.0000  | 0.0000  | 0.0000  | 0.0000  | 0.0000  | 0.0000  | 0.0138            | 0.0000  | 0.0000  | 0.0000  | 0.2843 |
| G_Staphylococcus         | 0.0000  | 0.0000  | 0.0000  | 0.0145  | 0.0000 | 0.0000  | 5.4992  | 0.0318  | 0.0000  | 0.0000  | 0.2458  | 0.0205  | 0.0000  | 0.0000  | 0.0000  | 0.0000  | 0.0172  | 0.0113  | 0.5012  | 2.9529  | 0.3205            | 0.0194  | 0.3574  | 0.5033  | 0.8333 |
| O_Bacillales div.        | 0.0000  | 0.0000  | 0.0000  | 0.0000  | 0.0000 | 0.0000  | 0.0000  | 0.0000  | 0.0000  | 0.0000  | 0.0029  | 0.0000  | 0.0000  | 0.0000  | 0.0000  | 0.0087  | 0.0086  | 0.0000  | 0.0000  | 0.0208  | 0.1092            | 0.0000  | 0.0265  | 0.1785  | 0.0395 |
| P_Firmicutes_NA          | 0.0176  | 0.2542  | 0.0075  | 0.0000  | 0.0000 | 0.0000  | 0.0000  | 0.0000  | 0.0000  | 0.0000  | 0.0000  | 0.0000  | 0.0808  | 0.0949  | 0.0244  | 0.0217  | 0.0000  | 0.0000  | 0.0000  | 0.0000  | 0.0306            | 0.0000  | 0.0000  | 0.0532  | 0.6069 |
| O_Rhodospirillales       | 0.0000  | 0.0000  | 0.0000  | 0.0000  | 0.0000 | 0.0000  | 0.0000  | 0.0000  | 0.0000  | 0.0000  | 0.0000  | 0.0000  | 0.0000  | 0.0000  | 0.0000  | 0.0000  | 0.0287  | 0.0000  | 0.0000  | 0.0035  | 0.1311            | 0.0000  | 0.0496  | 0.1633  | 0.022  |
| O_Sphingomonadales       | 0.0000  | 0.0000  | 0.0000  | 0.0290  | 0.0000 | 0.0000  | 0.0000  | 0.0000  | 0.0000  | 0.0489  | 0.0000  | 0.0075  | 0.0000  | 0.0000  | 0.0000  | 0.0117  | 0.0057  | 0.0000  | 0.0048  | 0.0304  | 0.0539            | 0.0000  | 0.0563  | 0.0589  | 0.1049 |
| C_Alphaproteobacteria_NA | 0.0000  | 0.0000  | 0.0000  | 0.0362  | 0.0    |         |         |         |         |         |         |         |         |         |         |         |         |         |         |         |                   |         |         |         |        |
