# Supplementary material for: Activated regulatory T-cells promote duodenal bacterial translocation into necrotic areas in severe acute pancreatitis
Source: HighWire-hosted journal article supplement (doi:10.1136/gutjnl-2022-327448), 2023-01-11
Supplement: gutjnl-2022-327448supp018_data_supplement.pdf [file gutjnl-2022-327448supp018_data_supplement.pdf]

Table with columns for PBS and DT (AP, con, etc.), rows for various bacterial families (e.g., F\_Coriobacteriaceae, G\_Lactobacillales), and a p-value column for DT vs PBS. Values range from 0.0000 to 0.0024.

Supplemental table 2: Relative abundance of 16S rRNA gene sequencing of duodenal samples of DEREG mice with AP vs controls. Significance was evaluated by contrast analysis.
