# Supplementary figures and images for: Activated regulatory T-cells promote duodenal bacterial translocation into necrotic areas in severe acute pancreatitis
Source: HighWire-hosted journal article supplement (doi:10.1136/gutjnl-2022-327448), 2023-01-11

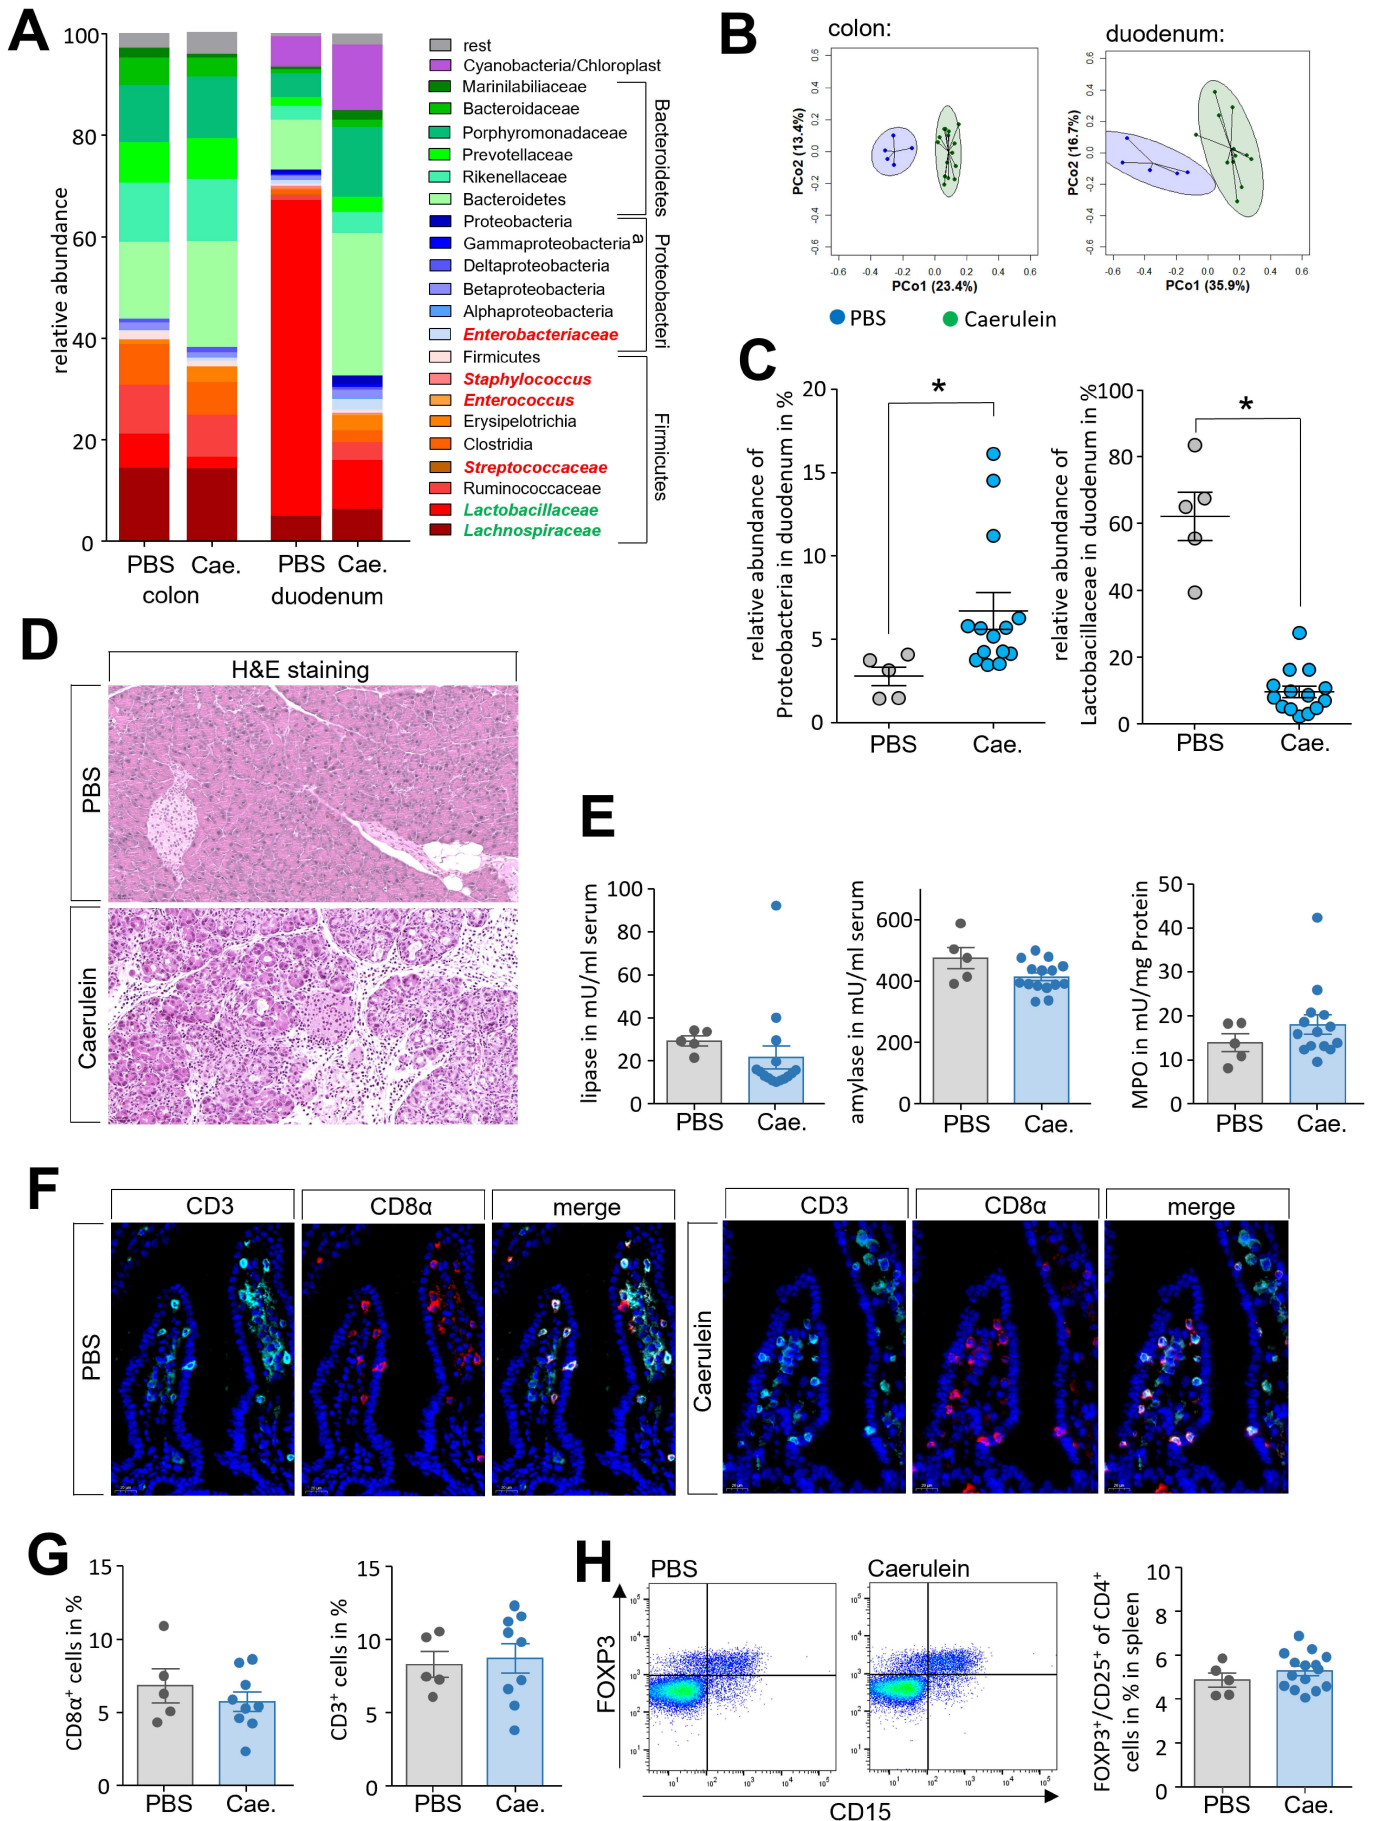

Supplement: gutjnl-2022-327448supp002_data_supplement.pdf [file gutjnl-2022-327448supp002_data_supplement.pdf]

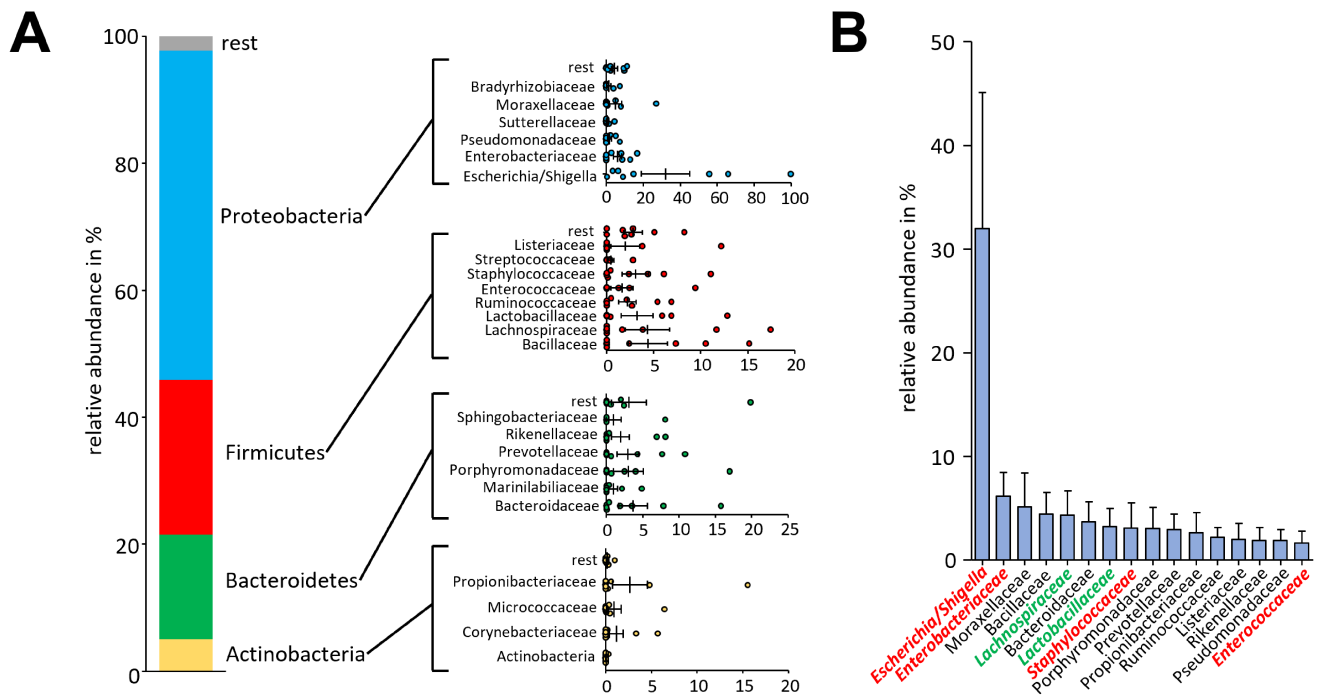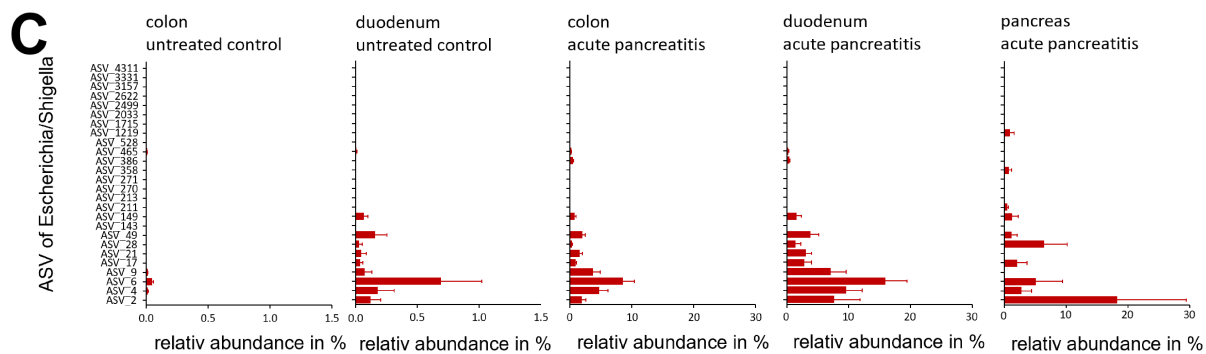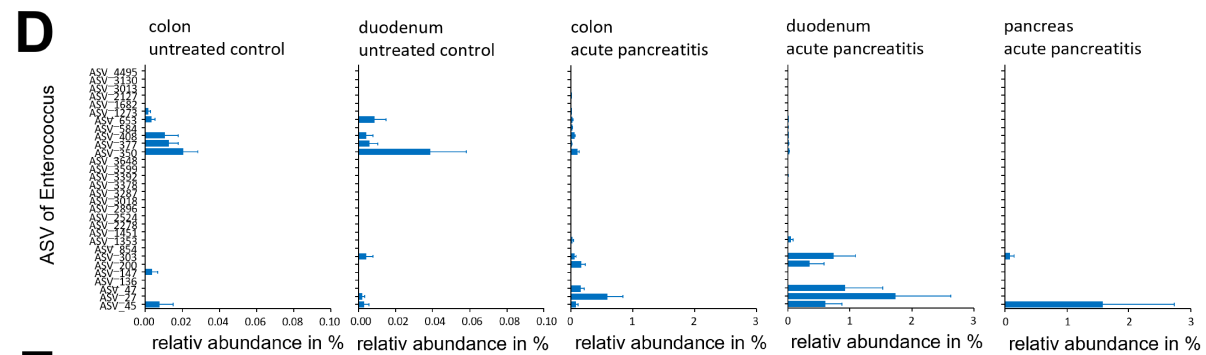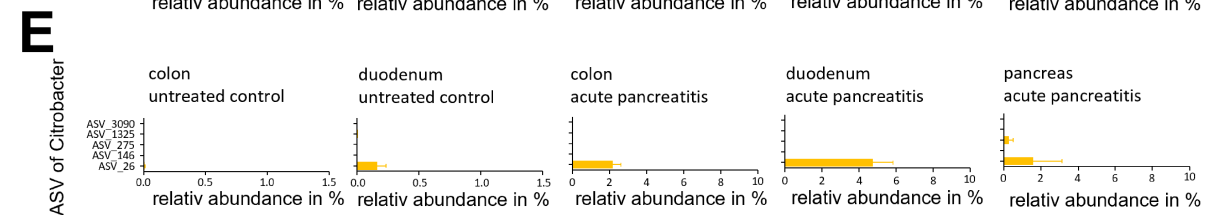

Supplement: gutjnl-2022-327448supp011_data_supplement.pdf [file gutjnl-2022-327448supp011_data_supplement.pdf]

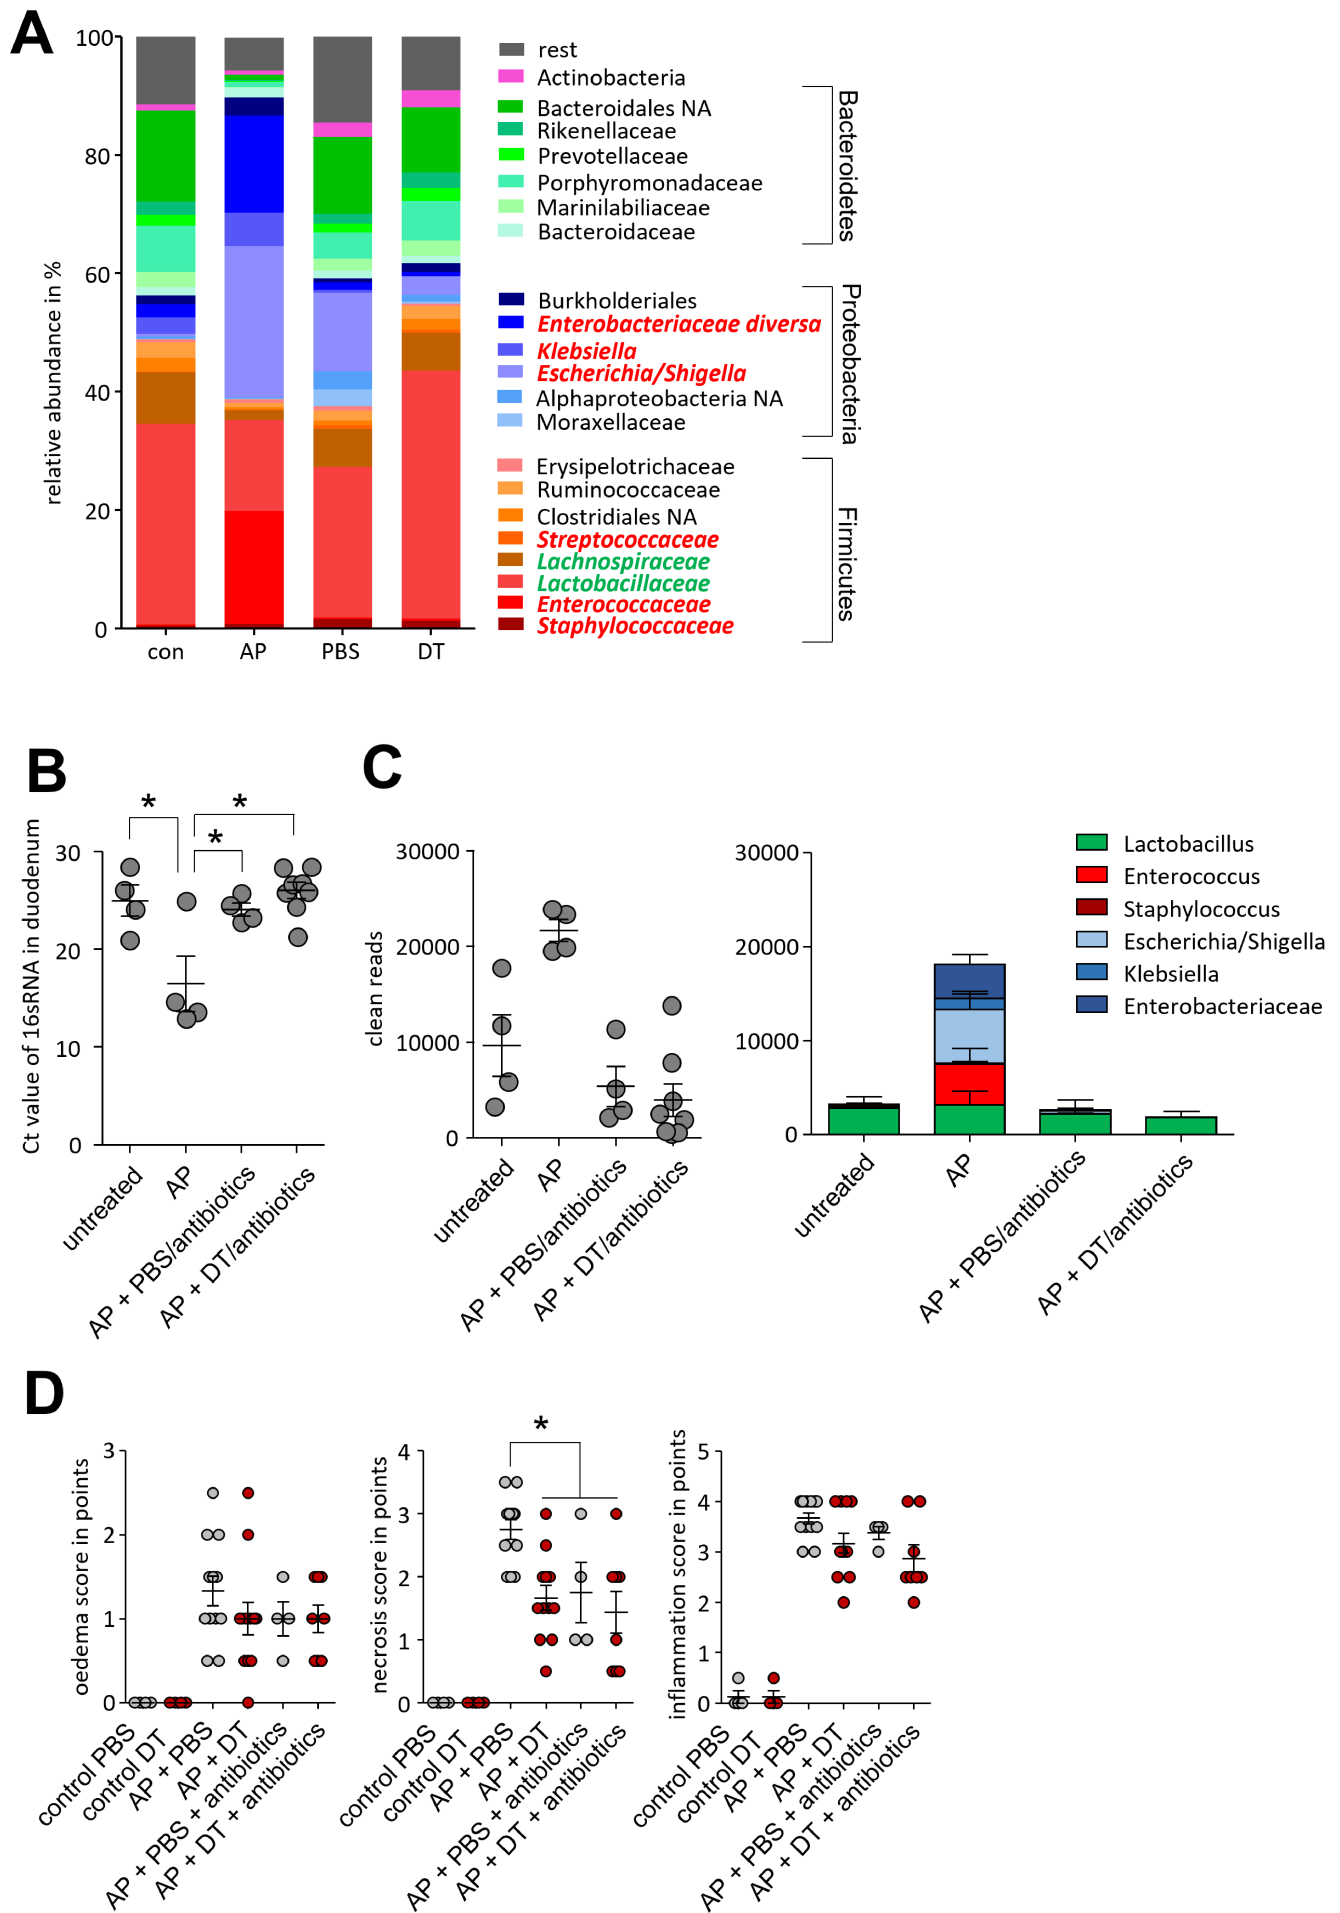

Supplement: gutjnl-2022-327448supp012_data_supplement.pdf [file gutjnl-2022-327448supp012_data_supplement.pdf]

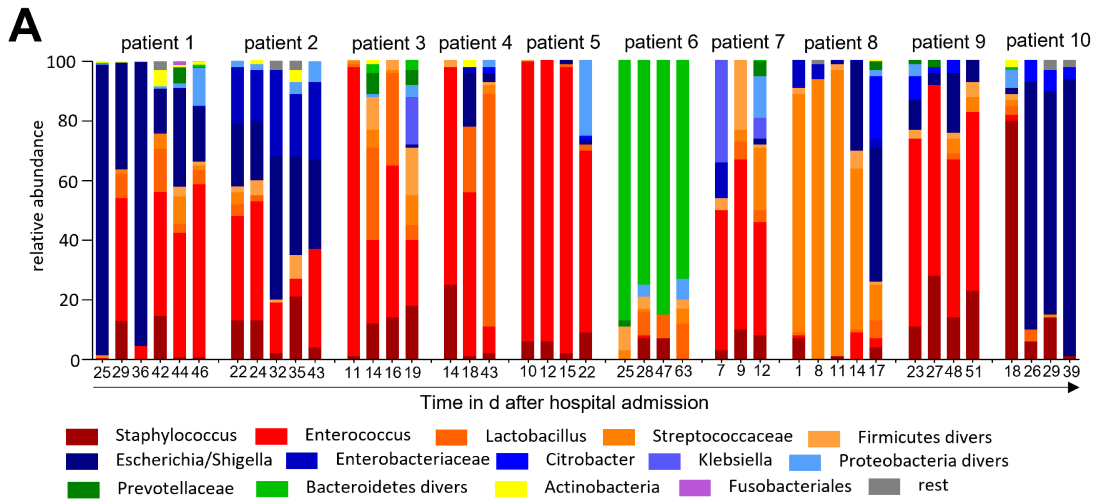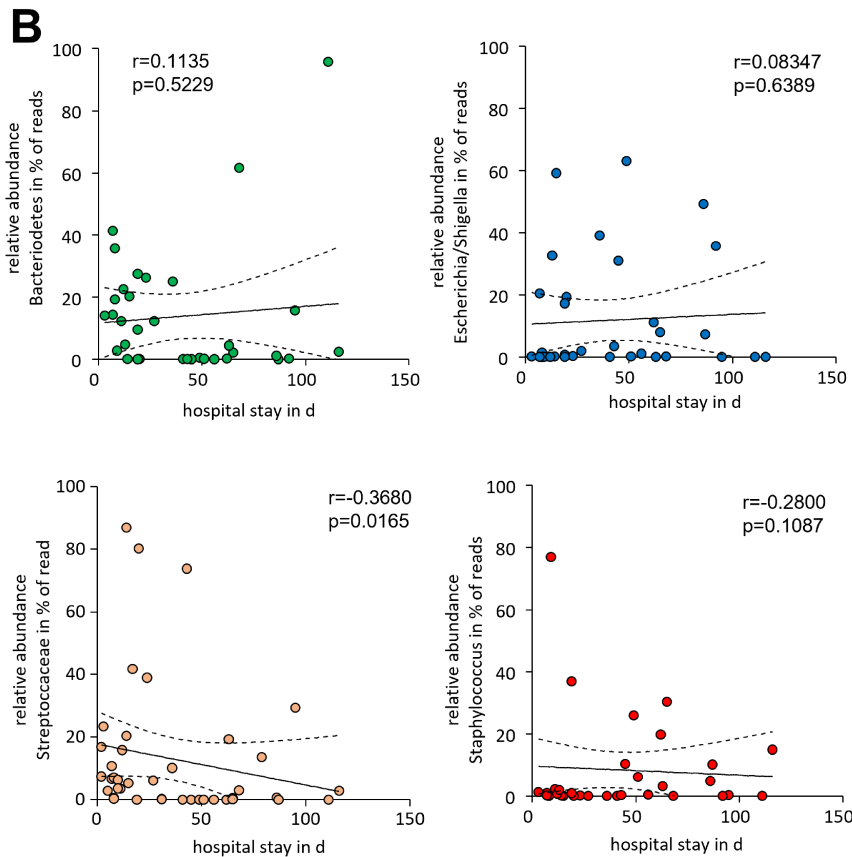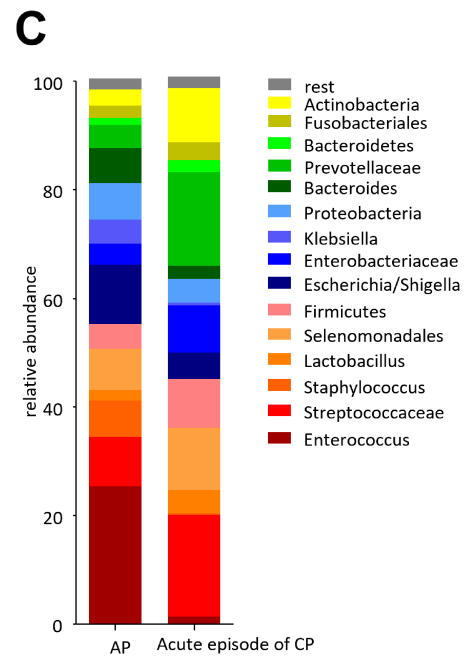

Supplement: gutjnl-2022-327448supp014_data_supplement.pdf [file gutjnl-2022-327448supp014_data_supplement.pdf]

**A**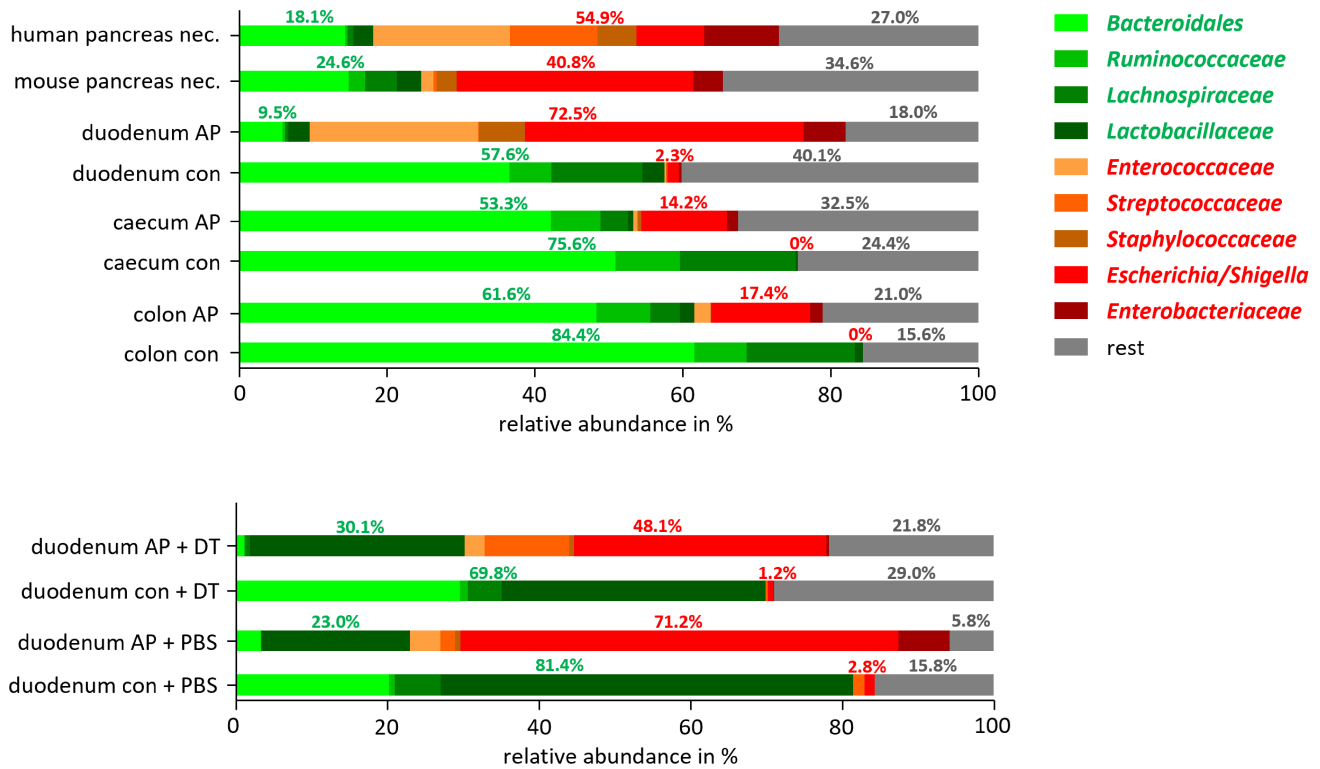

Supplement: gutjnl-2022-327448supp015_data_supplement.pdf [file gutjnl-2022-327448supp015_data_supplement.pdf]

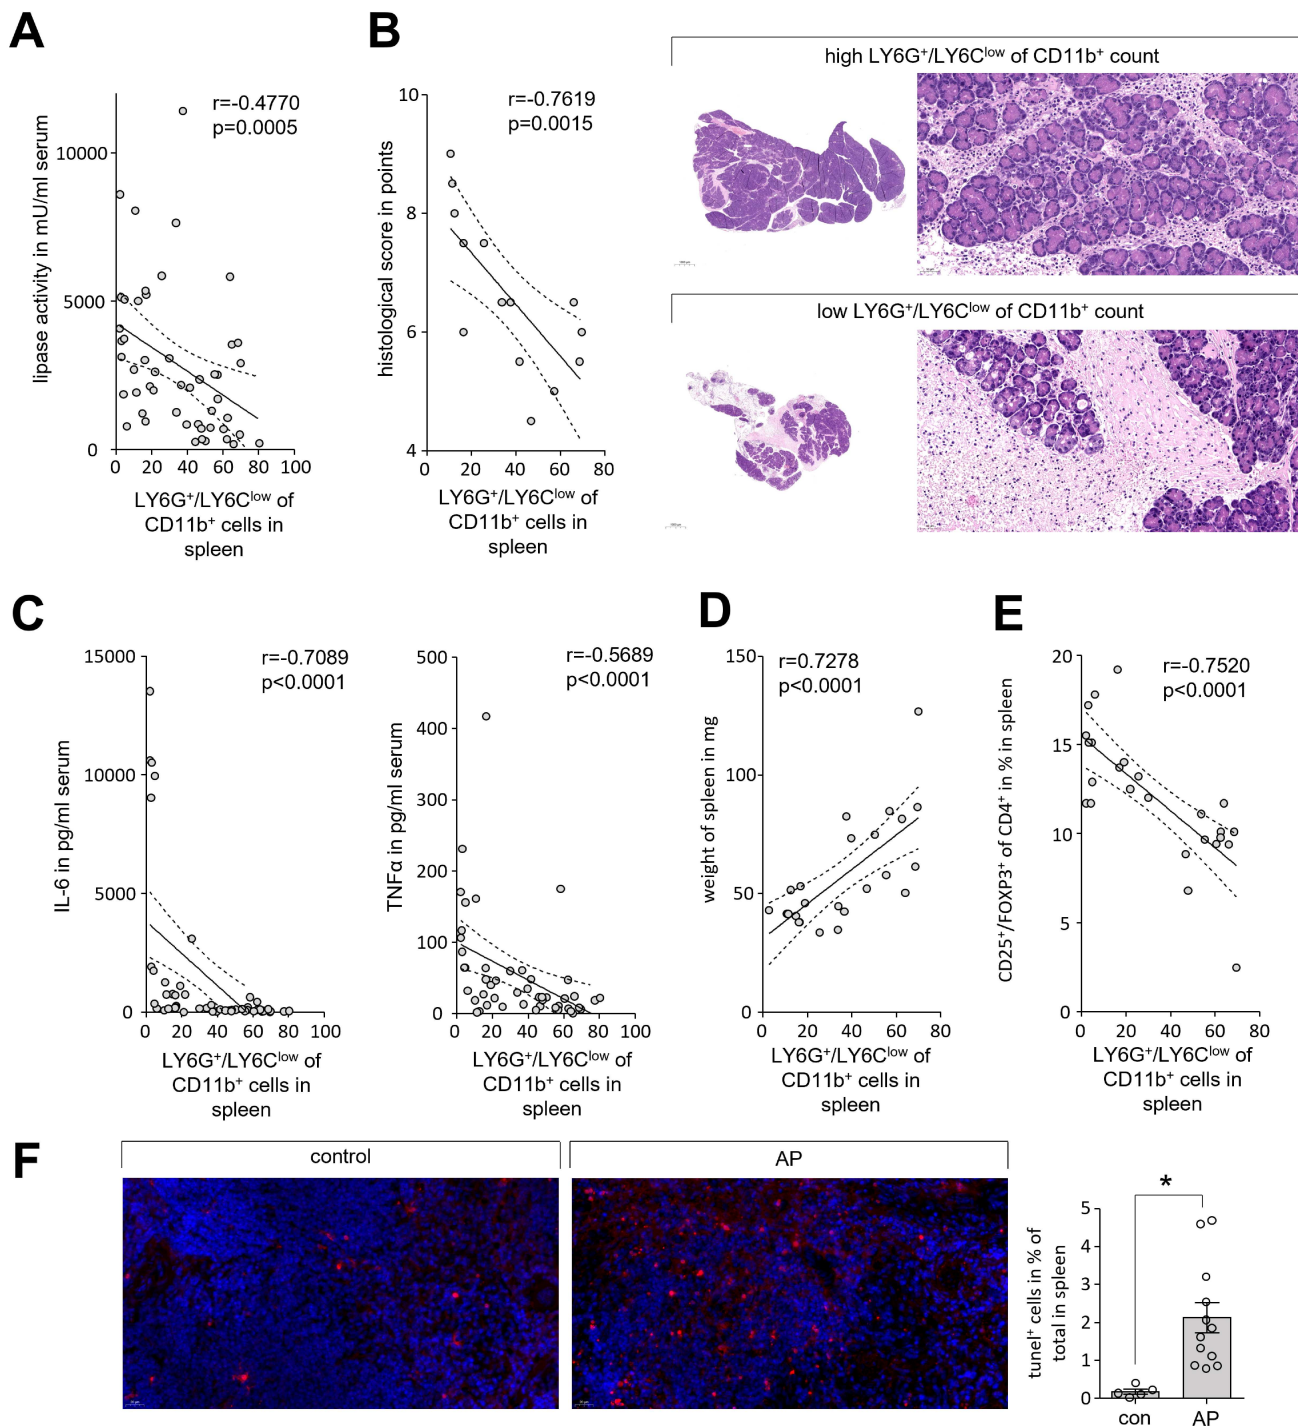

Supplement: gutjnl-2022-327448supp003_data_supplement.pdf [file gutjnl-2022-327448supp003_data_supplement.pdf]

**A**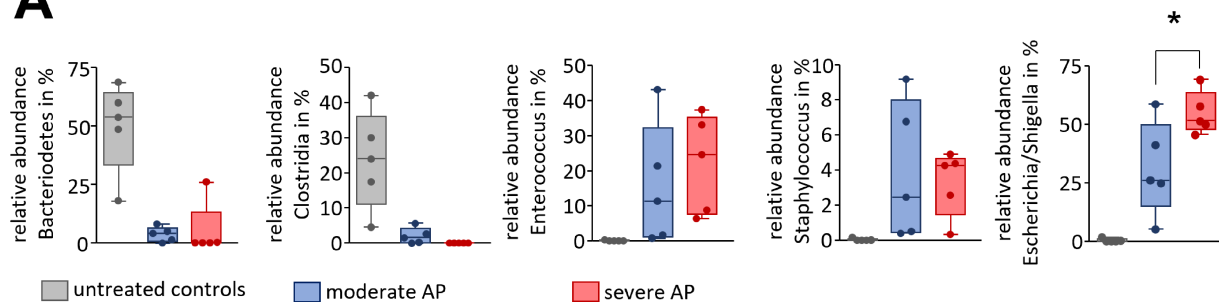**B**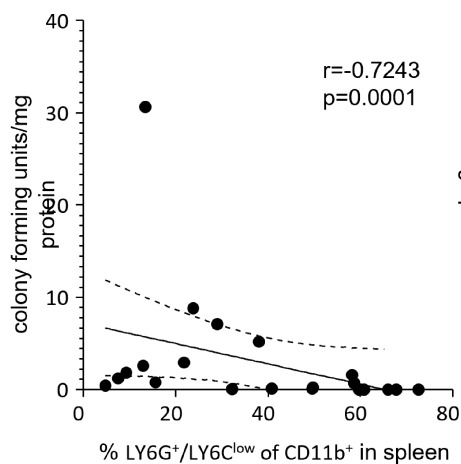**C**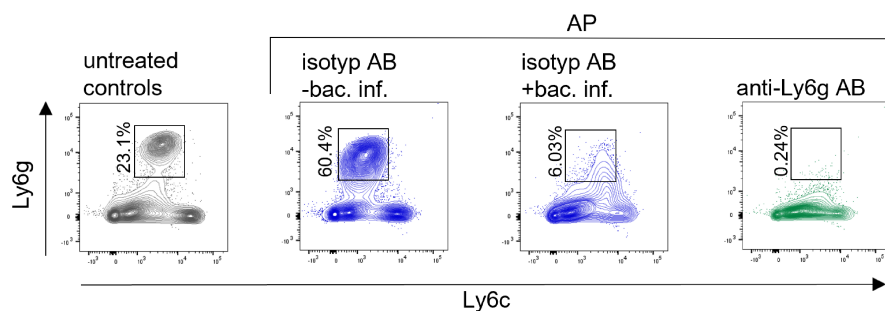**D**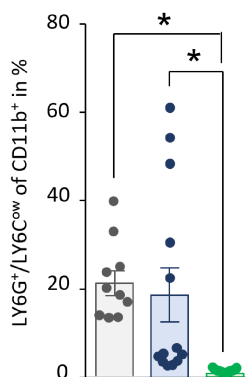**E**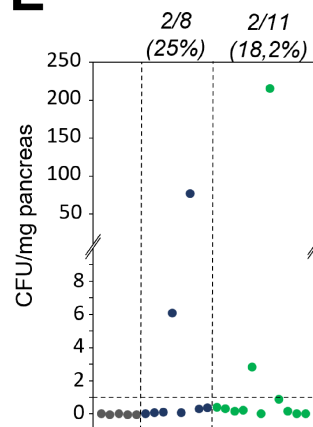**F**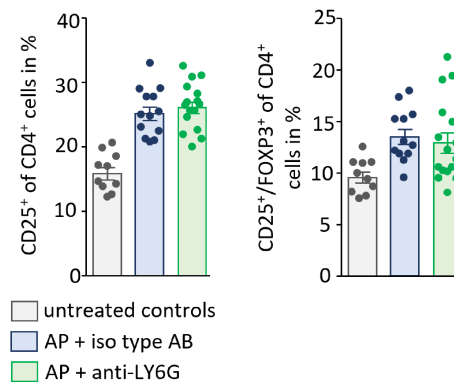

Supplement: gutjnl-2022-327448supp004_data_supplement.pdf [file gutjnl-2022-327448supp004_data_supplement.pdf]

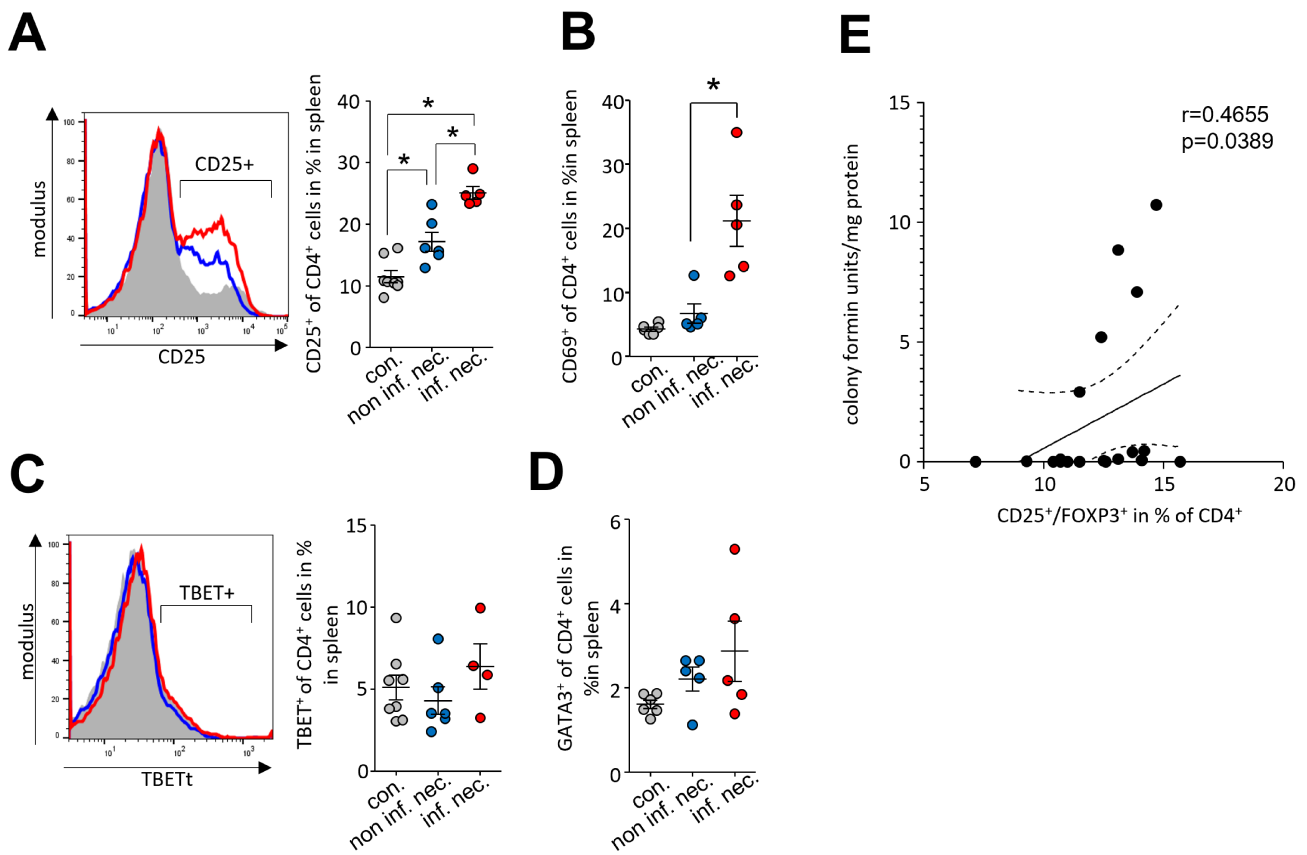

Supplement: gutjnl-2022-327448supp005_data_supplement.pdf [file gutjnl-2022-327448supp005_data_supplement.pdf]

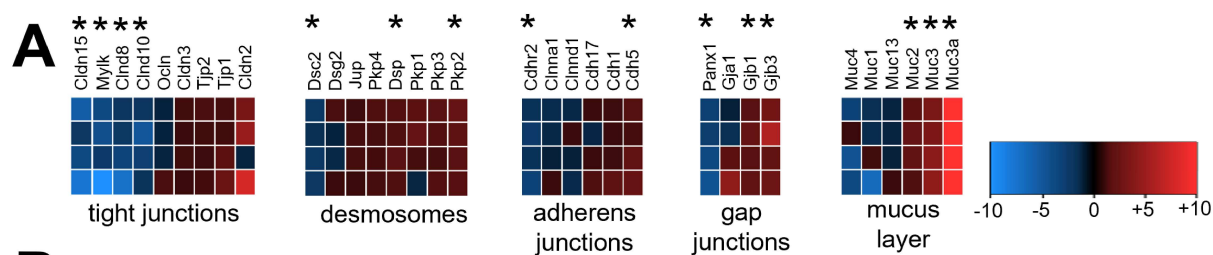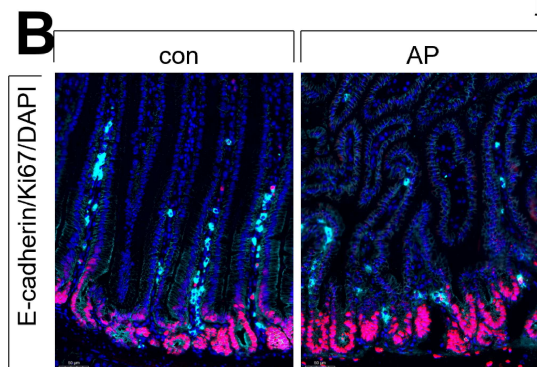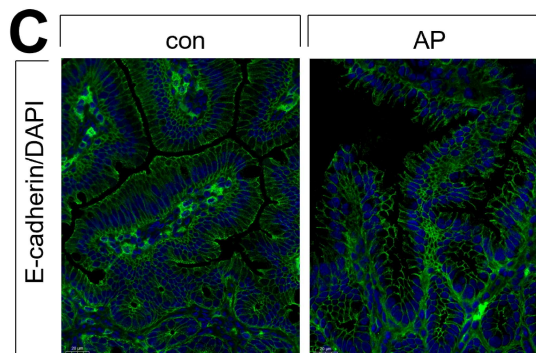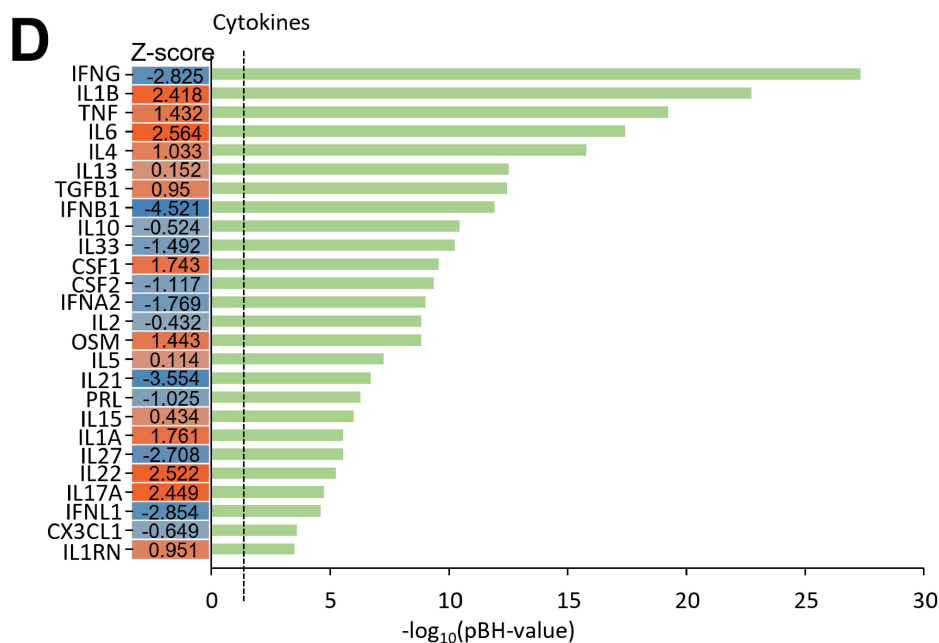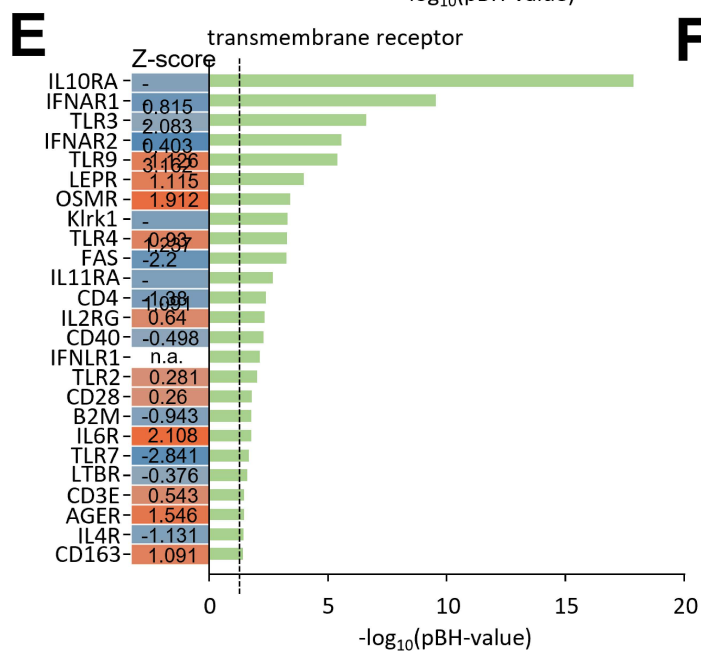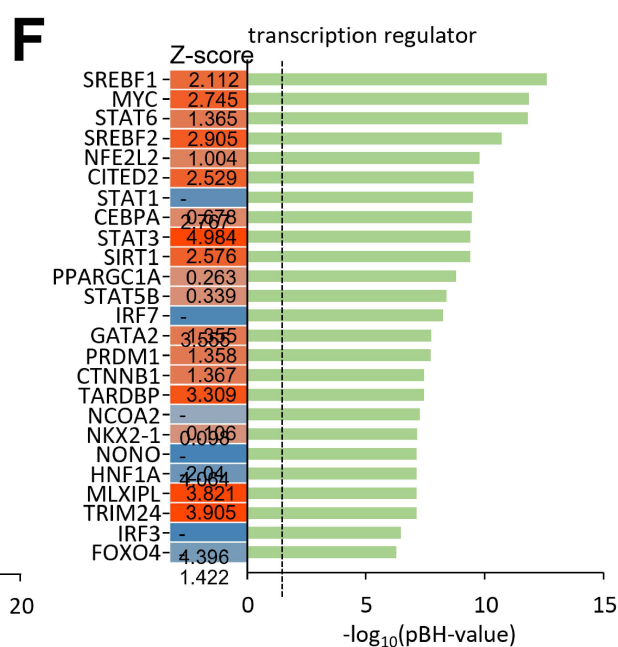

Supplement: gutjnl-2022-327448supp006_data_supplement.pdf [file gutjnl-2022-327448supp006_data_supplement.pdf]

**A**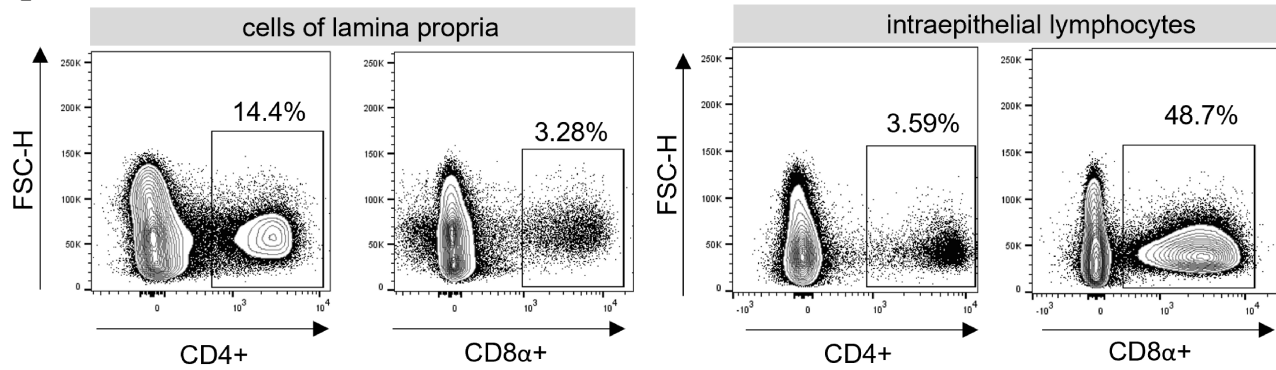**B**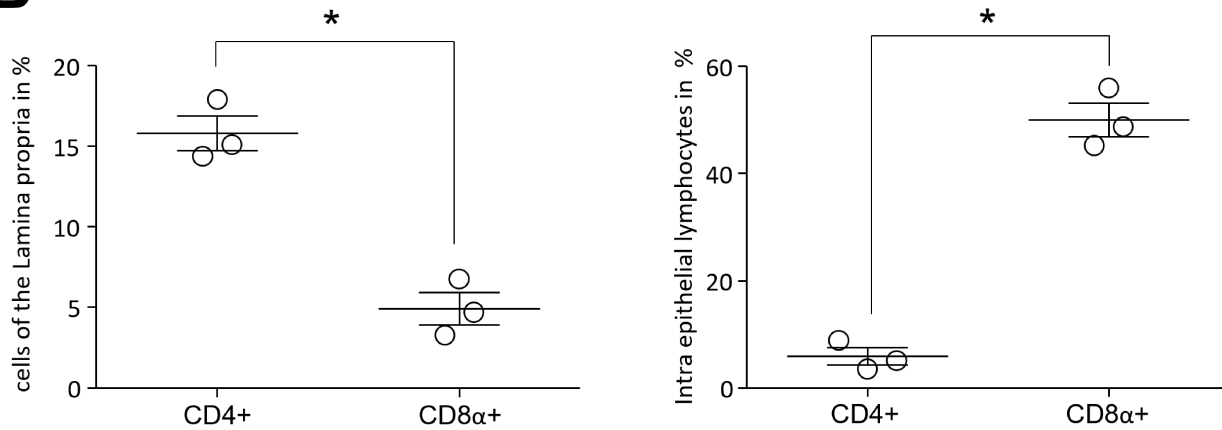**C**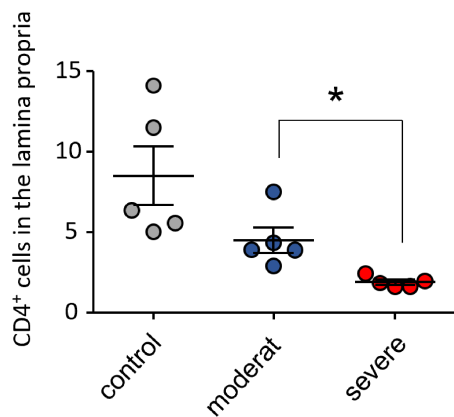

Supplement: gutjnl-2022-327448supp007_data_supplement.pdf [file gutjnl-2022-327448supp007_data_supplement.pdf]

**A**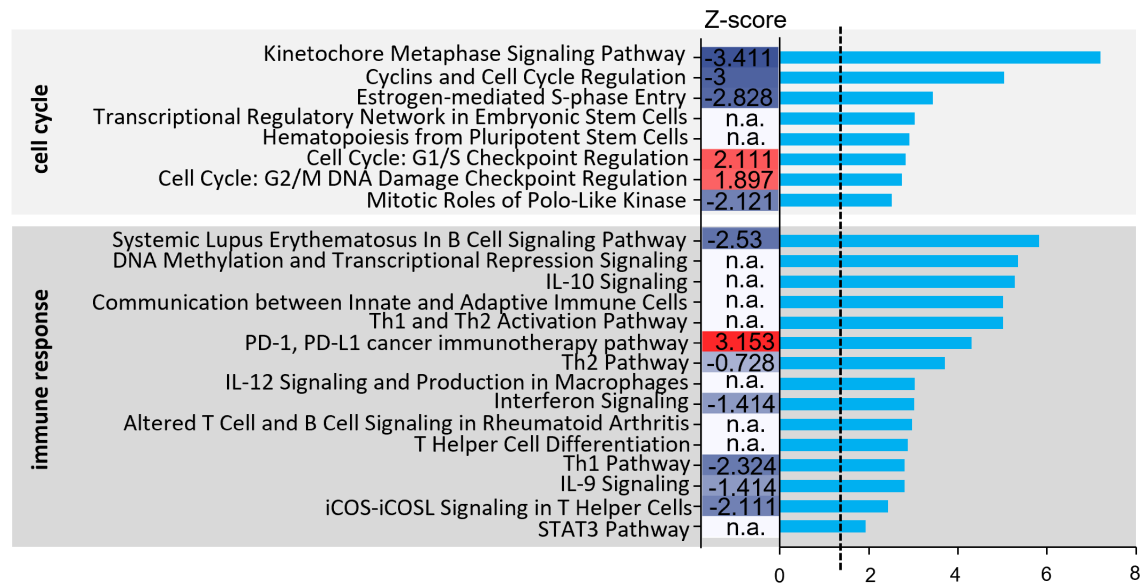**B**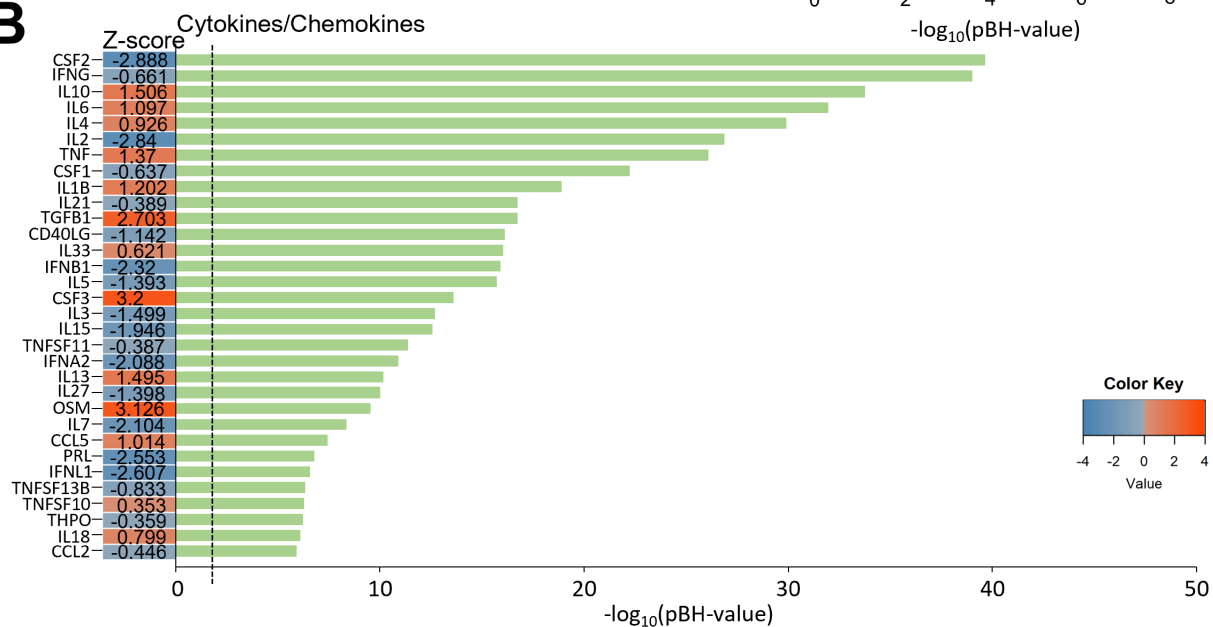**C**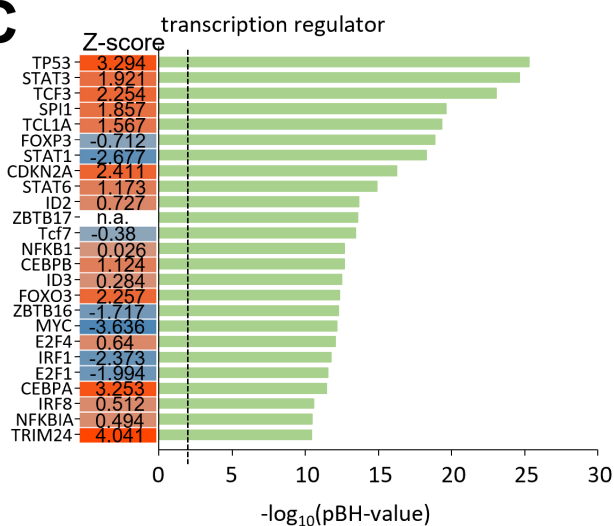**D**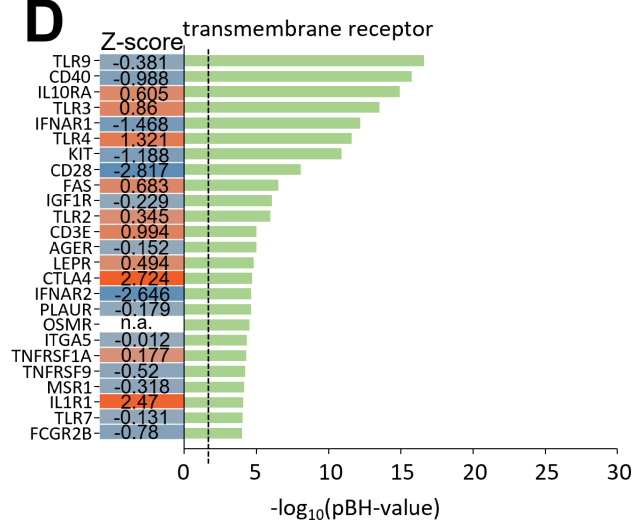

Supplement: gutjnl-2022-327448supp008_data_supplement.pdf [file gutjnl-2022-327448supp008_data_supplement.pdf]

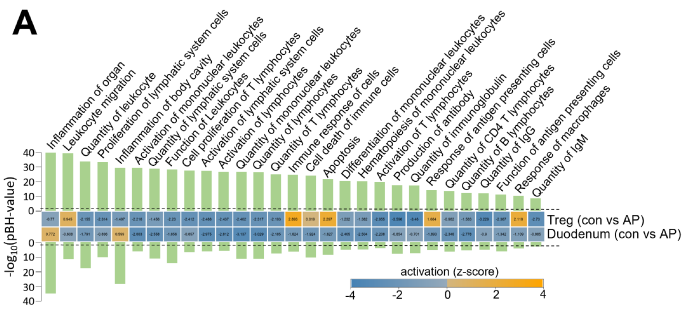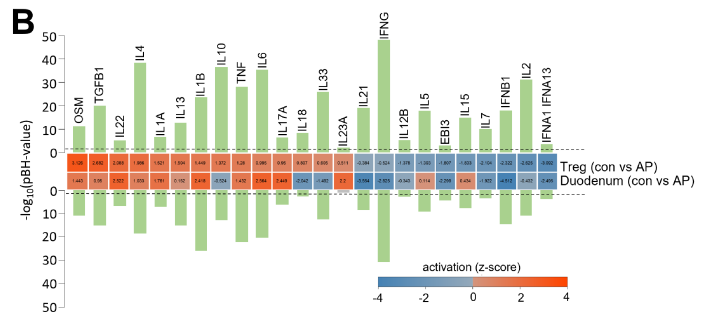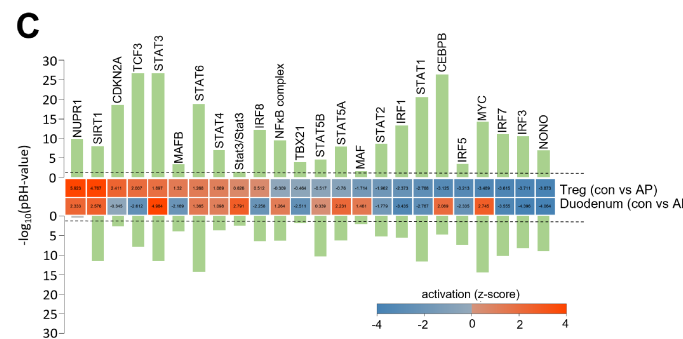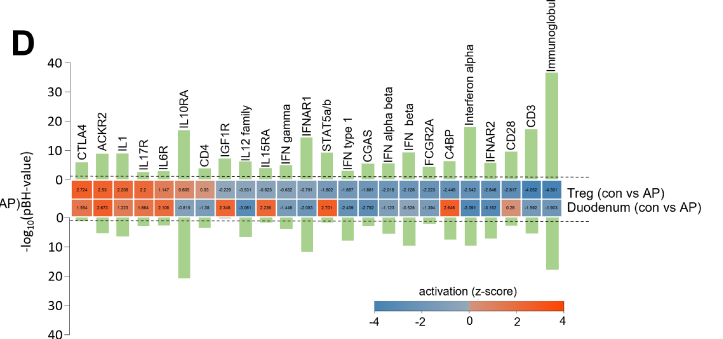

Supplement: gutjnl-2022-327448supp009_data_supplement.pdf [file gutjnl-2022-327448supp009_data_supplement.pdf]

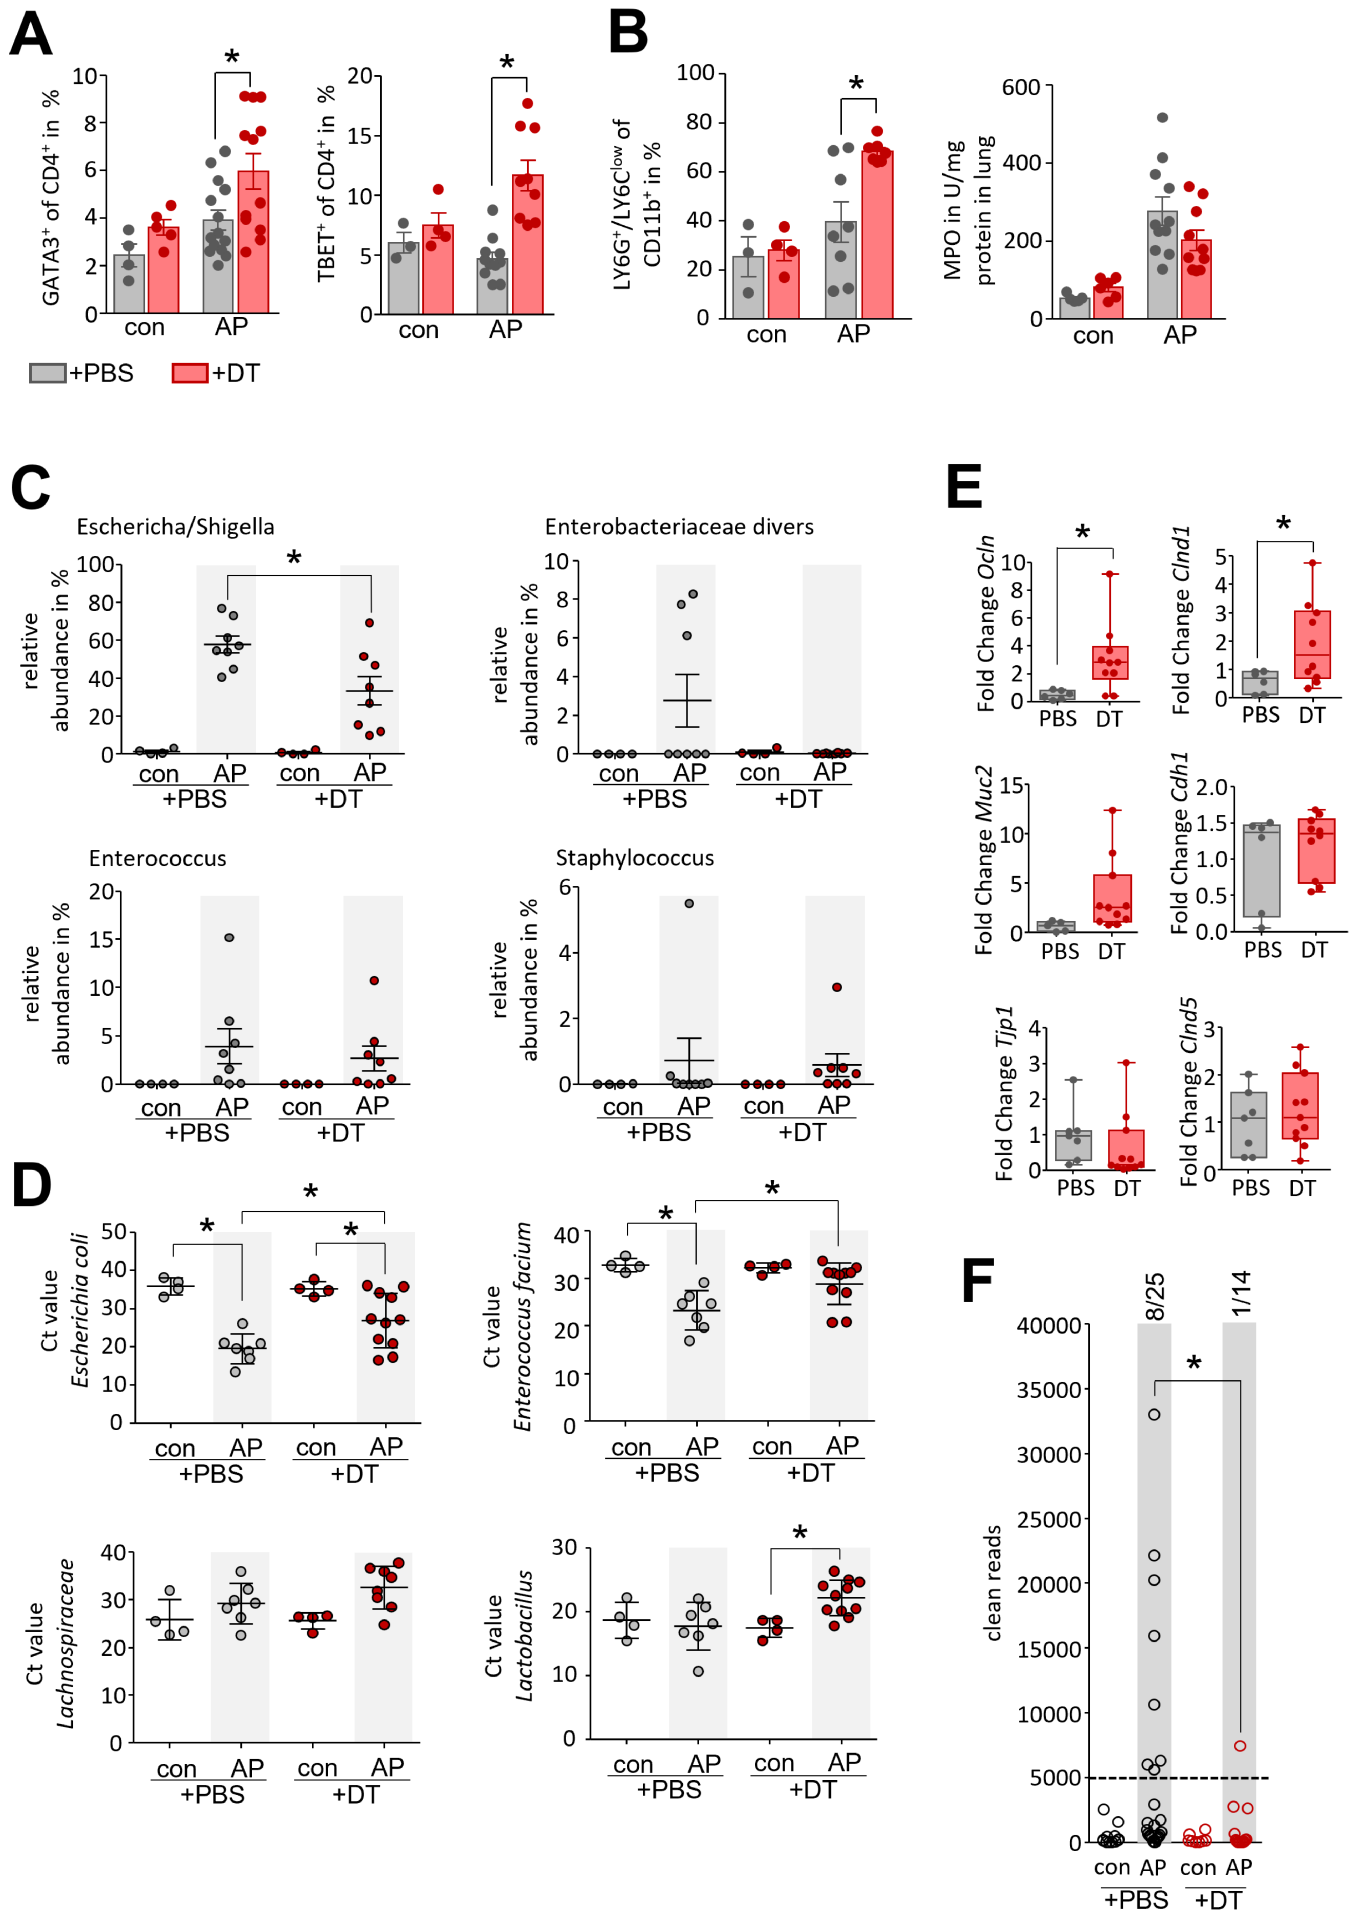

Supplement: gutjnl-2022-327448supp010_data_supplement.pdf [file gutjnl-2022-327448supp010_data_supplement.pdf]
